# Supplementary material
Source: MDPI journal article supplement (https://www.mdpi.com/2312-7481/8/1/1)
Supplement: s1 [file s1]

# Supplementary Material: Correlation between supramolecular connectivity and magnetic behaviour of $[\text{Fe}^{\text{III}}(5\text{-X-qsal})_2]^+$ based salts prone to exhibit SCO transition

Bruno J. C. Vieira <sup>1,\*</sup>, Laura C. J. Pereira <sup>1,\*</sup>, Vasco da Gama<sup>1</sup>, Isabel C. Santos<sup>1</sup>, Ana C. Cerdeira<sup>1</sup>, João C. Waerenborgh<sup>1</sup>

<sup>1</sup> Centro de Ciências e Tecnologias Nucleares, DECN, Instituto Superior Técnico, Universidade de Lisboa, E.N. 10, km 139,7, 2695-066 Bobadela LRS, Portugal; brunovieira@ctn.tecnico.ulisboa.pt (B.J.C.V.); lpereira@ctn.tecnico.ulisboa.pt (L.C.J.P.); vascog@ctn.tecnico.ulisboa.pt (V.G.); icsantos@ctn.tecnico.ulisboa.pt (I.C.S.); acerdeira@ctn.tecnico.ulisboa.pt (A.C.C.); jcarlos@ctn.tecnico.ulisboa.pt (J.C.W.)

\* Correspondence: brunovieira@ctn.tecnico.ulisboa.pt (B.J.C.V.); lpereira@ctn.tecnico.ulisboa.pt (L.C.J.P.)

Table S1 Summary of the crystal data, experimental details and refinement results

Table S2 Key parameters describing the DD contacts in the crystal structures of **3.BPh<sub>4</sub>** and **4.BPh<sub>4</sub>**, with the Dimer Chains supramolecular configuration.

Table S3 Key parameters describing the DD contacts in the crystal structures of the salts with type I Dimer Layers supramolecular configuration.

Table S4 Key parameters describing the DD contacts in the crystal structures of the salts with type II Dimer Layers supramolecular configuration.

Table S5 Key parameters describing the DD contacts in the crystal structures of **3.PF<sub>6</sub>.MeCN**, **4.PF<sub>6</sub>.H<sub>2</sub>O** and **5.PF<sub>6</sub>.2H<sub>2</sub>O**, with the Chain Layers supramolecular configuration.

Table S6 Summary of the parameters characterizing the SCO behavior of the salts with the Chain Layers supramolecular configuration and with HS configurations at room temperature.

Table S7 Summary of the parameters characterizing the octahedral distortion ( $\Sigma$  and  $\theta$ ).

Figure S1: Intrachain arrangements of the cations and DD contacts in the crystal structure of **4.BPh<sub>4</sub>**.

Figure S2: Top view of **4.BPh<sub>4</sub>** showing the most relevant DA contacts arrangement around one anion with cations from three neighbouring cationic chains. The cations in orange show  $\pi\pi$  contacts to the Ph groups of the anion, those in light green show strong  $\text{CH}\cdots\pi$  contacts to the anion and the ones depicted in light blue display weaker DA contacts.

Figure S3: View of the crystal structure of **3.Cl.MeCN.H<sub>2</sub>O** along *b*. The cations belonging to one of the cationic layers are depicted in dark blue.

Figure S4: Arrangement of the cations, anions and H<sub>2</sub>O molecules within one layer of **3.Cl.MeCN.H<sub>2</sub>O**. The four cations in orange show  $\pi\pi$  DD interactions with the central cationic dimer.

Figure S5: View of the interlayer DD contacts and arrangements of the  $[\text{Fe}(5\text{-X-qsal})_2]^+$  cations relative to a central cation (in the default colour scheme) for **3.Cl.MeCN.H<sub>2</sub>O** (a), **4.BF<sub>4</sub>.H<sub>2</sub>O** (b) and **3.ClO<sub>4</sub>** (c). See text for details.

Figure S6: Indirect (D...X...D) connectivity mediated by one strongly coupled  $\text{Cl}^-\cdots\text{H}_2\text{O}$  pair in **3.Cl.MeCN.H<sub>2</sub>O**.

Figure S7: View of the crystal structure of **5.Cl.MeOH.3H<sub>2</sub>O** along *c*. The cations belonging to one of the cationic layers are depicted in dark blue.

Figure S8: Arrangement of the cations within one layer of **5.Cl.MeOH.3H<sub>2</sub>O**. The four cations in orange show strong  $\pi\pi$  DD interactions with the central cationic dimer. The cations in darker orange correspond to cations with even stronger DD interactions,  $\text{DD}^{\text{IL}}_1$ , where the  $\pi\pi$  interactions are reinforced by strong two fold  $\text{CH}\cdots\pi$  interactions.

Figure S9: View of the DD contacts and arrangements of the  $[\text{Fe}(5\text{-I-qsal})_2]^+$  cations relative to a central cation (in the default colour scheme) for **5.Cl.MeOH.3H<sub>2</sub>O**.

Figure S10: Indirect D...X...D connectivity in **5.Cl.MeOH.3H<sub>2</sub>O** mediated by strongly coupled aggregates containing two  $\text{Cl}^-$  anions, six  $\text{H}_2\text{O}$  molecules and one methanol molecule with two possible locations. In one of those locations the MeOH atoms are depicted in light grey and its contacts are omitted.

Figure S11: View of the overlaps between the Ph-X groups in the DD interlayer interactions,  $\text{DD}^{\text{IL}}$ , in **5.Cl.MeOH.3H<sub>2</sub>O** (a), **4.SCN.0.5H<sub>2</sub>O** (b), **6.Cl.2MeOH.0.5H<sub>2</sub>O** HS (c) and **6.Cl.2MeOH.0.5H<sub>2</sub>O** LS (d).. View of the overlaps between the Ph-X groups in the DD interlayer interactions,  $\text{DD}^{\text{IL}}$ , in **5.Cl.MeOH.3H<sub>2</sub>O** (a), **4.SCN.0.5H<sub>2</sub>O** (b), **6.Cl.2MeOH.0.5H<sub>2</sub>O** HS (c) and **6.Cl.2MeOH.0.5H<sub>2</sub>O** LS (d).

Figure S12: Detail of the intrachain arrangement and the most relevant DD contacts in **5.PF<sub>6</sub>.1.5H<sub>2</sub>O**.

Figure S13: Arrangement of three cationic chains within one layer in **5.PF<sub>6</sub>.1.5H<sub>2</sub>O**. The cations in central chain are in the “ball and stick mode”, while the cations of the other two are represented in the “stick mode”. The cations in orange displays strong  $\pi\pi$  interactions with cations from the central chain further reinforced by two fold  $\text{CH}\cdots\pi$  interactions.

Figure S14: View in the default colour scheme of the interlayer DD contacts and arrangements of the  $[\text{Fe}(5\text{-I-qsal})_2]^+$  cations relative to a central cation for **5.PF<sub>6</sub>.1.5H<sub>2</sub>O**. Only the cations depicted in light blue and in violet belong to the neighbouring layers, those in light grey and orange are located in the same layer as the central cations (the contacts involving these cations are omitted for clarity).

Figure S15: Indirect (D...A...D) connectivity mediated by one  $\text{PF}_6^-$  anion in **5.PF<sub>6</sub>.1.5H<sub>2</sub>O**. The anion shows interactions to four cations (D1-D4) in one layer and to another cation (D5) located in a neighbouring layer.

Figure S16: Indirect connectivity assistance to the direct DD intrachain, (a)  $\text{DD}^{\text{Ch}_1}$  and (b)  $\text{DD}^{\text{Ch}_2}$ , intralayer (c)  $\text{DD}^{\text{L}}$  and interlayer (d)  $\text{DD}^{\text{IL}}_1$  interactions in **5.PF<sub>6</sub>.1.5H<sub>2</sub>O**.  $\text{DD}^{\text{Ch}_1}$  is assisted by a pair of interactions mediated by the  $\text{H}_2\text{O}$  molecules and for  $\text{DD}^{\text{Ch}_2}$ ,  $\text{DD}^{\text{L}}$  and  $\text{DD}^{\text{IL}}_1$  the DD interactions are assisted by a pair of DAD connections.

Figure S17: Intrachain indirect connectivity mediated by the solvent molecules and anions to the direct DD interactions ( $DD^{Ch_1}$  and  $DD^{Ch_2}$ ) in **3.PF<sub>6</sub>.MeCN** (a and d), **4.PF<sub>6</sub>.H<sub>2</sub>O** (b and e) and **5.PF<sub>6</sub>.1.5H<sub>2</sub>O** (c and f).

Figure S18: Indirect DAD connectivity assistance to the direct DD intralayer ( $DD^L$ ) and interlayer ( $DD^{iL_1}$  and  $DD^{iL_2}$ ) interactions regarding **3.PF<sub>6</sub>.MeCN** (a, d and g), **4.PF<sub>6</sub>.H<sub>2</sub>O** (b e and h) and **5.PF<sub>6</sub>.1.5H<sub>2</sub>O** (c, f and i).

Table S1. Summary of the crystal data, experimental details and refinement results

|                                                  | <b>3.Cl.MeCN.H<sub>2</sub>O</b>                                                  | <b>3.ClO<sub>4</sub></b>                                                         | <b>3.PF<sub>6</sub>.MeCN</b>                                                                      | <b>3.BF<sub>4</sub></b>                                                                           |
|--------------------------------------------------|----------------------------------------------------------------------------------|----------------------------------------------------------------------------------|---------------------------------------------------------------------------------------------------|---------------------------------------------------------------------------------------------------|
| <b>Empirical Formula</b>                         | C <sub>34</sub> H <sub>25</sub> Cl <sub>3</sub> Fe N <sub>5</sub> O <sub>3</sub> | C <sub>32</sub> H <sub>20</sub> Cl <sub>3</sub> Fe N <sub>4</sub> O <sub>6</sub> | C <sub>34</sub> H <sub>23</sub> Cl <sub>2</sub> F <sub>6</sub> Fe N <sub>5</sub> O <sub>2</sub> P | C <sub>34</sub> H <sub>23</sub> B Cl <sub>2</sub> F <sub>4</sub> Fe N <sub>5</sub> O <sub>2</sub> |
| <b>Molecular mass</b>                            | 713.79                                                                           | 718.72                                                                           | 805.29                                                                                            | 747.13                                                                                            |
| <b>Temperature</b>                               | 150(2) K                                                                         | 150(2) K                                                                         | 150(2)                                                                                            | 293(2) K                                                                                          |
| <b>Crystal size (mm)</b>                         | 0.220 x 0.180 x 0.100                                                            | 0.200 x 0.100 x 0.080                                                            | 0.200 x 0.140 x 0.050                                                                             | 0.400x0.100x0.050                                                                                 |
| <b>Crystal colour, shape</b>                     | Black, prism                                                                     | Black, prism                                                                     | Black, prism                                                                                      | Black, prism                                                                                      |
| <b>Crystal system</b>                            | Monoclinic                                                                       | Triclinic                                                                        | Triclinic                                                                                         | Triclinic                                                                                         |
| <b>Space group (no.)</b>                         | P 21/n                                                                           | P-1                                                                              | P-1                                                                                               | P-1                                                                                               |
| <b>a (Å)</b>                                     | 12.2867(4)                                                                       | 10.0903(2)                                                                       | 11.6572(5)                                                                                        | 11.6278(4)                                                                                        |
| <b>b (Å)</b>                                     | 15.2146(6)                                                                       | 12.4912(3)                                                                       | 12.4883(6)                                                                                        | 12.3036(4)                                                                                        |
| <b>c (Å)</b>                                     | 16.2029(6)                                                                       | 23.0761(7)                                                                       | 12.7109(6)                                                                                        | 12.5792(4)                                                                                        |
| <b>α (Å)</b>                                     | 90                                                                               | 86.2860(10)                                                                      | 109.7630(10)                                                                                      | 69.491(2)                                                                                         |
| <b>β (Å)</b>                                     | 92.3130(10)                                                                      | 80.0800(10)                                                                      | 90.3900(10)                                                                                       | 69.337(2)                                                                                         |
| <b>γ (Å)</b>                                     | 90                                                                               | 89.925(2)                                                                        | 111.8440(10)                                                                                      | 88.467(2)                                                                                         |
| <b>V (Å<sup>3</sup>)</b>                         | 3026.46(19)                                                                      | 2858.87(12)                                                                      | 1597.67(13)                                                                                       | 1567.47(9)                                                                                        |
| <b>Z, D<sub>calcd.</sub> (mg m<sup>-3</sup>)</b> | 4, 1.567                                                                         | 4, 1.670                                                                         | 2, 1.674                                                                                          | 2, 1.583                                                                                          |
| <b>μ (mm<sup>-1</sup>)</b>                       | 0.81                                                                             | 0.864                                                                            | 0.768                                                                                             | 0.718                                                                                             |
| <b>F(000)</b>                                    | 1460                                                                             | 1460                                                                             | 814                                                                                               | 758                                                                                               |
| <b>Theta range (deg)</b>                         | 2.959 to 26.372                                                                  | 2.917 to 25.029                                                                  | 2.755 to 25.027                                                                                   | 2.730 to 25.678                                                                                   |
| <b>Index range (h, k, l)</b>                     | -15/15, -19/18, -20/19                                                           | -12/12, -14/14, -27/27                                                           | -11/13, -14/14, -15/15                                                                            | -14/13, -14/14, -15/14                                                                            |
| <b>Refl. collected/unique</b>                    | 23199/6121[Rint=0.0401]                                                          | 24611/10013[Rint=0.0529]                                                         | 9327/5536 [Rint=0.0343]                                                                           | 14524/5849[Rint=0.0372]                                                                           |
| <b>Completeness θ =25.242</b>                    | 99.20%                                                                           | 99.40%                                                                           | 98.00%                                                                                            | 98.40%                                                                                            |
| <b>T max./min.</b>                               | 0.923 and 0.842                                                                  | 0.934 and 0.846                                                                  | 0.963 and 0.862                                                                                   | 0.965 and 0.762                                                                                   |
| <b>Goodness-of-fit on F<sup>2</sup></b>          | 1.042                                                                            | 1.007                                                                            | 1.051                                                                                             | 1.059                                                                                             |
| <b>Final R1 [I &gt; 2σ(I)]/wR2</b>               | R1 = 0.0341, wR2 = 0.0782                                                        | R1=0.0489, wR2=0.1086                                                            | R1=0.0413, wR2=0.0910                                                                             | R1 = 0.0482, wR2 = 0.1185                                                                         |
| <b>Spin State</b>                                | Low-Spin                                                                         | Low-Spin                                                                         | Low-Spin (SCO)                                                                                    | Low-Spin                                                                                          |
| <b>Supramolecular Configuration</b>              | Type I Dimer Layers                                                              | Type I Dimer Layers                                                              | Chain Layers                                                                                      | Type I Dimer Layers                                                                               |

Table S1 (continued)

|                                                  | <b>3.BPh<sub>4</sub></b>                                                           | <b>4.Cl.MeCN.H<sub>2</sub>O</b>                                                     | <b>4.ClO<sub>4</sub></b>                                                            | <b>4.PF<sub>6</sub>.H<sub>2</sub>O</b>                                                            |
|--------------------------------------------------|------------------------------------------------------------------------------------|-------------------------------------------------------------------------------------|-------------------------------------------------------------------------------------|---------------------------------------------------------------------------------------------------|
| <b>Empirical Formula</b>                         | C <sub>56</sub> H <sub>40</sub> B Cl <sub>2</sub> Fe N <sub>4</sub> O <sub>2</sub> | C <sub>34</sub> H <sub>25</sub> Cl Br <sub>2</sub> Fe N <sub>5</sub> O <sub>3</sub> | C <sub>32</sub> H <sub>20</sub> Cl Br <sub>2</sub> Fe N <sub>4</sub> O <sub>6</sub> | C <sub>32</sub> H <sub>22</sub> Br <sub>2</sub> F <sub>6</sub> Fe N <sub>4</sub> O <sub>3</sub> P |
| <b>Molecular mass</b>                            | 938.48                                                                             | 802.71                                                                              | 807.64                                                                              | 871.17                                                                                            |
| <b>Temperature</b>                               | 150(2) K                                                                           | 150(2) K                                                                            | 150(2) K                                                                            | 150(2)                                                                                            |
| <b>Crystal size (mm)</b>                         | 0.260 x 0.160 x 0.030                                                              | 0.350 x 0.200 x 0.100                                                               | 0.100 x 0.080 x 0.060                                                               | 0.200 x 0.100 x 0.060                                                                             |
| <b>Crystal colour, shape</b>                     | Black, prism                                                                       | Black, prism                                                                        | Black, prism                                                                        | Black, prism                                                                                      |
| <b>Crystal system</b>                            | Triclinic                                                                          | Monoclinic                                                                          | Triclinic                                                                           | Triclinic                                                                                         |
| <b>Space group (no.)</b>                         | P-1                                                                                | P 21/n                                                                              | P-1                                                                                 | P-1                                                                                               |
| <b>a (Å)</b>                                     | 11.5300(3)                                                                         | 12.2907(5)                                                                          | 10.2637(5)                                                                          | 11.9483(3)                                                                                        |
| <b>b (Å)</b>                                     | 14.1235(5)                                                                         | 15.3389(6)                                                                          | 12.4457(5)                                                                          | 12.4436(4)                                                                                        |
| <b>c (Å)</b>                                     | 14.5540(5)                                                                         | 16.4190(7)                                                                          | 23.3685(12)                                                                         | 12.4841(3)                                                                                        |
| <b>α (Å)</b>                                     | 84.5220(10)                                                                        | 90                                                                                  | 87.405(2)                                                                           | 67.9420(10)                                                                                       |
| <b>β (Å)</b>                                     | 86.360(2)                                                                          | 91.8110(10)                                                                         | 78.898(2)                                                                           | 87.698(2)                                                                                         |
| <b>γ (Å)</b>                                     | 71.6650(10)                                                                        | 90                                                                                  | 89.622(3)                                                                           | 70.081(2)                                                                                         |
| <b>V (Å<sup>3</sup>)</b>                         | 2238.03(13)                                                                        | 3093.9(2)                                                                           | 2926.2(2)                                                                           | 1609.13(8)                                                                                        |
| <b>Z, D<sub>calcd.</sub> (mg m<sup>-3</sup>)</b> | 2, 1.393                                                                           | 4, 1.723                                                                            | 4, 1.833                                                                            | 2, 1.798                                                                                          |
| <b>μ (mm<sup>-1</sup>)</b>                       | 0.506                                                                              | 3.202                                                                               | 3.393                                                                               | 3.078                                                                                             |
| <b>F(000)</b>                                    | 970                                                                                | 1604                                                                                | 1604                                                                                | 862                                                                                               |
| <b>Theta range (deg)</b>                         | 2.748 to 25.681                                                                    | 2.815 to 25.027                                                                     | 3.193 to 25.026                                                                     | 2.665 to 25.681                                                                                   |
| <b>Index range (h, k, l)</b>                     | -14/14, -17/17, -17/17                                                             | -14/14, -18/18, -19/19                                                              | -12/11, -14/14, -27/27                                                              | -14/13, -14/15, -14/15                                                                            |
| <b>Refl. collected/unique</b>                    | 22508/8433[Rint=0.0386]                                                            | 37478/5461[Rint=0.0477]                                                             | 21145/10261[Rint=0.0678]                                                            | 13003/6064 [Rint=0.0425]                                                                          |
| <b>Completeness θ =25.242</b>                    | 99.30%                                                                             | 99.80%                                                                              | 99.40%                                                                              | 99.4                                                                                              |
| <b>T max./min.</b>                               | 0.985 and 0.880                                                                    | 0.740 and 0.400                                                                     | 0.822 and 0.728                                                                     | 0.837 and 0.578                                                                                   |
| <b>Goodness-of-fit on F<sup>2</sup></b>          | 1.039                                                                              | 1.091                                                                               | 0.887                                                                               | 0.964                                                                                             |
| <b>Final R1 [I &gt; 2σ(I)]/wR2</b>               | R1=0.0408, wR2 = 0.0933                                                            | R1 = 0.0349, wR2 = 0.0863                                                           | R1=0.0559, wR2=0.0939                                                               | R1=0.0464, wR2=0.1094                                                                             |
| <b>Spin State</b>                                | Low-Spin                                                                           | Low-Spin                                                                            | Low-Spin                                                                            | Low-Spin (SCO)                                                                                    |
| <b>Supramolecular Configuration</b>              | Dimer Chains                                                                       | Type I Dimer Layers                                                                 | Type I Dimer Layers                                                                 | Chain Layers                                                                                      |

Table S1 (continued)

|                                                  | <b>4.SCN.0.5H<sub>2</sub>O</b>                                                                                | <b>4.BF<sub>4</sub>.0.5H<sub>2</sub>O</b>                                                                                   | <b>4.BPh<sub>4</sub></b>                                                           | <b>5.Cl.MeOH.2.5H<sub>2</sub>O</b>                                                                            |
|--------------------------------------------------|---------------------------------------------------------------------------------------------------------------|-----------------------------------------------------------------------------------------------------------------------------|------------------------------------------------------------------------------------|---------------------------------------------------------------------------------------------------------------|
| <b>Empirical Formula</b>                         | C <sub>66</sub> H <sub>42</sub> Br <sub>4</sub> Fe <sub>2</sub> S <sub>2</sub> N <sub>10</sub> O <sub>5</sub> | C <sub>64</sub> H <sub>42</sub> B <sub>2</sub> Br <sub>4</sub> F <sub>8</sub> Fe <sub>2</sub> N <sub>8</sub> O <sub>5</sub> | C <sub>56</sub> H <sub>40</sub> B Br <sub>2</sub> Fe N <sub>4</sub> O <sub>2</sub> | C <sub>65</sub> H <sub>52</sub> Cl <sub>2</sub> Fe <sub>2</sub> I <sub>4</sub> N <sub>8</sub> O <sub>11</sub> |
| <b>Molecular mass</b>                            | 1550.55                                                                                                       | 1608.01                                                                                                                     | 1027.4                                                                             | 1811.34                                                                                                       |
| <b>Temperature</b>                               | 150(2) K                                                                                                      | 150(2) K                                                                                                                    | 150(2) K                                                                           | 150(2) K                                                                                                      |
| <b>Crystal size (mm)</b>                         | 0.200x0.160x0.100                                                                                             | 0.350x0.200x0.060                                                                                                           | 0.240 x 0.200 x 0.130                                                              | 0.160 x 0.060 x 0.020                                                                                         |
| <b>Crystal colour, shape</b>                     | Black, prism                                                                                                  | Black, prism                                                                                                                | Black, prism                                                                       | Black, prism                                                                                                  |
| <b>Crystal system</b>                            | Triclinic                                                                                                     | Monoclinic                                                                                                                  | Triclinic                                                                          | Triclinic                                                                                                     |
| <b>Space group (no.)</b>                         | P-1                                                                                                           | P 21/n                                                                                                                      | P-1                                                                                | P-1                                                                                                           |
| <b>a (Å)</b>                                     | 11.0587(6)                                                                                                    | 13.5594(8)                                                                                                                  | 11.6596(2)                                                                         | 10.7546(7)                                                                                                    |
| <b>b (Å)</b>                                     | 12.3463(7)                                                                                                    | 16.0511(9)                                                                                                                  | 14.2408(3)                                                                         | 12.6720(8)                                                                                                    |
| <b>c (Å)</b>                                     | 12.5416(8)                                                                                                    | 14.3784(9)                                                                                                                  | 14.5222(3)                                                                         | 13.9877(10)                                                                                                   |
| <b>α (Å)</b>                                     | 63.4200(10)                                                                                                   | 90                                                                                                                          | 85.0640(10)                                                                        | 63.558(2)                                                                                                     |
| <b>β (Å)</b>                                     | 74.087(2)                                                                                                     | 106.775(2)                                                                                                                  | 85.9370(10)                                                                        | 74.536(2)                                                                                                     |
| <b>γ (Å)</b>                                     | 73.265(2)                                                                                                     | 90                                                                                                                          | 70.4880(10)                                                                        | 74.864(2)                                                                                                     |
| <b>V (Å<sup>3</sup>)</b>                         | 1560.48(16)                                                                                                   | 2996.2(3)                                                                                                                   | 2262.11(8)                                                                         | 1622.52(19)                                                                                                   |
| <b>Z, D<sub>calcd.</sub> (mg m<sup>-3</sup>)</b> | 1, 1.650                                                                                                      | 2, 1.782                                                                                                                    | 2, 1.508                                                                           | 1, 1.854                                                                                                      |
| <b>μ (mm<sup>-1</sup>)</b>                       | 3.152                                                                                                         | 3.237                                                                                                                       | 2.149                                                                              | 2.499                                                                                                         |
| <b>F(000)</b>                                    | 772                                                                                                           | 1592                                                                                                                        | 1042                                                                               | 884                                                                                                           |
| <b>Theta range (deg)</b>                         | 2.959 to 25.026                                                                                               | 2.938 to 25.346                                                                                                             | 2.995 to 25.026 deg.                                                               | 2.910 to 25.027                                                                                               |
| <b>Index range (h, k, l)</b>                     | -12/13, -14/14, -16/14                                                                                        | -13/16, -19/18, -17/17                                                                                                      | -13/13, -16/16, -17/17                                                             | -12/12, -15/12, -16/16                                                                                        |
| <b>Refl. collected/unique</b>                    | 9125/5405[Rint=0.0233]                                                                                        | 20689/5486[Rint=0.0632]                                                                                                     | 42720/7940[Rint=0.0323]                                                            | 11554/5638 [Rint= 0.0447]                                                                                     |
| <b>Completeness<br/>θ =25.242</b>                | 98.00%                                                                                                        | 99.9                                                                                                                        | 99.50%                                                                             | 98.30%                                                                                                        |
| <b>T max./min.</b>                               | 0.743 and 0.571                                                                                               | 0.829 and 0.397                                                                                                             | 0.768 and 0.627                                                                    | 0.952 and 0.691                                                                                               |
| <b>Goodness-of-fit on F<sup>2</sup></b>          | 1.072                                                                                                         | 1.109                                                                                                                       | 1.084                                                                              | 1.061                                                                                                         |
| <b>Final R1 [I &gt; 2σ(I)]/wR2</b>               | R1 = 0.0417, wR2 = 0.1100                                                                                     | R1=0.0577, wR2= 0.1541                                                                                                      | R1=0.0280, wR2 = 0.0672                                                            | R1 = 0.0450, wR2 = 0.1252                                                                                     |
| <b>Spin State</b>                                | High-Spin                                                                                                     | Low-Spin                                                                                                                    | Low-Spin                                                                           | High-Spin                                                                                                     |
| <b>Supramolecular Configuration</b>              | Type II Dimer Layers                                                                                          | Type I Dimer Layers                                                                                                         | Dimer Chains                                                                       | Type II Dimer Layers                                                                                          |

Table S1 (continued)

|                                                  |                                                                                                                             |
|--------------------------------------------------|-----------------------------------------------------------------------------------------------------------------------------|
|                                                  | <b>5.PF<sub>6</sub>.1.5H<sub>2</sub>O</b>                                                                                   |
| <b>Empirical Formula</b>                         | C <sub>64</sub> H <sub>46</sub> I <sub>4</sub> F <sub>12</sub> Fe <sub>2</sub> N <sub>8</sub> O <sub>7</sub> P <sub>2</sub> |
| <b>Molecular mass</b>                            | 1948.34                                                                                                                     |
| <b>Temperature</b>                               | 150(2)                                                                                                                      |
| <b>Crystal size (mm)</b>                         | 0.200 x 0.020 x 0.020                                                                                                       |
| <b>Crystal colour, shape</b>                     | Black, prism                                                                                                                |
| <b>Crystal system</b>                            | Triclinic                                                                                                                   |
| <b>Space group (no.)</b>                         | P-1                                                                                                                         |
| <b>a (Å)</b>                                     | 12.3301(4)                                                                                                                  |
| <b>b (Å)</b>                                     | 12.4309(5)                                                                                                                  |
| <b>c (Å)</b>                                     | 12.5360(5)                                                                                                                  |
| <b>α (Å)</b>                                     | 87.794(2)                                                                                                                   |
| <b>β (Å)</b>                                     | 68.4950(10)                                                                                                                 |
| <b>γ (Å)</b>                                     | 68.6750(10)                                                                                                                 |
| <b>V (Å<sup>3</sup>)</b>                         | 1655.29(11)                                                                                                                 |
| <b>Z, D<sub>calcd.</sub> (mg m<sup>-3</sup>)</b> | 1, 1.955                                                                                                                    |
| <b>μ (mm<sup>-1</sup>)</b>                       | 2.446                                                                                                                       |
| <b>F(000)</b>                                    | 944                                                                                                                         |
| <b>Theta range (deg)</b>                         | 3.035 to 25.023                                                                                                             |
| <b>Index range (h, k, l)</b>                     | -14/14, -14/13, -14/14                                                                                                      |
| <b>Refl. collected/unique</b>                    | 15989/5613 [R <sub>int</sub> =0.0501]                                                                                       |
| <b>Completeness θ =25.242</b>                    | 95.8                                                                                                                        |
| <b>T max./min.</b>                               | 0.953 and 0.640                                                                                                             |
| <b>Goodness-of-fit on F<sup>2</sup></b>          | 1.041                                                                                                                       |
| <b>Final R1 [I &gt; 2σ(I)]/wR2</b>               | R1=0.0398, wR2=0.0721                                                                                                       |
| <b>Spin State</b>                                | Low-Spin (SCO)                                                                                                              |
| <b>Supramolecular Configuration</b>              | Chain Layers                                                                                                                |

Table S2. Key parameters describing the DD contacts in the crystal structures of **3.BPh<sub>4</sub>** and **4.BPh<sub>4</sub>**, with the Dimer Chains supramolecular configuration

|                        | <b>3.BPh<sub>4</sub> (150K)</b> |                                                     |           |                                             |              | <b>4.BPh<sub>4</sub> (150K)</b> |                                                     |           |                                             |              |
|------------------------|---------------------------------|-----------------------------------------------------|-----------|---------------------------------------------|--------------|---------------------------------|-----------------------------------------------------|-----------|---------------------------------------------|--------------|
|                        | <b>LS</b>                       |                                                     |           |                                             |              | <b>LS</b>                       |                                                     |           |                                             |              |
| <b>Dimer</b>           | <b>d</b>                        | <b><math>\alpha</math></b>                          | <b>ov</b> | <b>comm.</b>                                |              | <b>d</b>                        | <b><math>\alpha</math></b>                          | <b>ov</b> | <b>comm.</b>                                |              |
| <b>[D...D]</b>         |                                 |                                                     |           |                                             |              |                                 |                                                     |           |                                             |              |
| <b>DD<sup>d</sup></b>  | <b>3.417</b>                    | <b>0 (L-L)<sup>II</sup>/0.3 <math>\pi\pi</math></b> |           |                                             |              | <b>3.462</b>                    | <b>0 (L-L)<sup>II</sup>/0.3 <math>\pi\pi</math></b> |           |                                             |              |
|                        | <b>2.576</b>                    | <b>152.1</b>                                        | ----      | <b>C-H...O<sup>2F</sup></b>                 |              | <b>2.603</b>                    | <b>152.2</b>                                        | ----      | <b>C-H...O<sup>2F</sup></b>                 |              |
|                        | <b>3.397</b>                    | <b>80.1</b>                                         | ----      | <b>C-Cl...<math>\pi</math><sup>2F</sup></b> | <b>D...D</b> | <b>3.502</b>                    | <b>88.7</b>                                         | ----      | <b>C-Br...<math>\pi</math><sup>2F</sup></b> | <b>D...D</b> |
| <b>Chain</b>           | <b>d</b>                        | <b><math>\alpha</math></b>                          | <b>ov</b> | <b>comm.</b>                                |              | <b>d</b>                        | <b><math>\alpha</math></b>                          | <b>ov</b> | <b>comm.</b>                                |              |
| <b>DD...DD</b>         |                                 |                                                     |           |                                             |              |                                 |                                                     |           |                                             |              |
| <b>DD<sup>Ch</sup></b> | <b>3.427</b>                    | <b>128.3</b>                                        | ----      | <b>C-Cl...<math>\pi</math></b>              | <b>D...D</b> | <b>3.479</b>                    | <b>124.4</b>                                        | ----      | <b>C-Br...<math>\pi</math></b>              | <b>D...D</b> |

<sup>a</sup>, DD interactions within the dimers (DD<sup>d</sup>) and interdimer intrachain (DD<sup>Ch</sup>)

**d**, interatomic separation of the contacts or distance between the average planes of the ligands in the case of  $\pi\pi$  interactions.

**$\alpha$** , angle of the contact or angle between the average planes in the case of  $\pi\pi$  interactions.

**overlap**, characterization of the  $\pi\pi$  overlap.

L-L corresponds to the overlap over the entire length of the ligand (with two overlaps between the Ph and Qn groups).

The index <sup>I/II</sup> refers to the number of overlapping rings.

The numerical value corresponds to an estimation of the extension of the overlap (as the fraction of the area of the overlap vs. the area of one ring)

**contact**, characterization of the contact (the superscript 2F concerns two fold contacts)

**Int. cat.**, interacting cations

**Colour Code:** **Red** corresponds to  $\pi\pi$  interactions, **Blue** corresponds to hydrogen bonds, **Purple** corresponds to halogen bonds.



Table S3. Key parameters describing the DD contacts in the crystal structures of the salts with type I Dimer Layers supramolecular configuration (continues next page)

| <sup>a</sup>                      | 3.Cl.MeCN.H <sub>2</sub> O (150K) |                            |            |                             |           | 4.Cl.MeCN.H <sub>2</sub> O (150K) |                            |            |                             |           | 4BF <sub>4</sub> .H <sub>2</sub> O (150K) |                            |            |                             |           |
|-----------------------------------|-----------------------------------|----------------------------|------------|-----------------------------|-----------|-----------------------------------|----------------------------|------------|-----------------------------|-----------|-------------------------------------------|----------------------------|------------|-----------------------------|-----------|
|                                   | LS                                |                            |            |                             |           | LS                                |                            |            |                             |           | LS                                        |                            |            |                             |           |
| Dimer                             | <i>d</i> (Å)                      | $\alpha$ (°)               | overlap    | contact                     | Int. cat. | <i>d</i> (Å)                      | $\alpha$ (°)               | overlap    | contact                     | Int. cat. | <i>d</i> (Å)                              | $\alpha$ (°)               | overlap    | contact                     | Int. cat. |
| DD <sup>d</sup>                   | 3.403                             | 0 (L-L) <sup>II</sup> /0.3 | $\pi\pi$   |                             |           | 3.410                             | 0 (L-L) <sup>II</sup> /0.3 | $\pi\pi$   |                             |           | 3.352                                     | 0 (L-L) <sup>II</sup> /0.5 | $\pi\pi$   |                             |           |
|                                   | 2.478                             | 150.7                      | ----       | C-H...O <sup>2F</sup>       |           | 2.456                             | 151.9                      | ----       | C-H...O <sup>2F</sup>       |           | 2.652                                     | 152.9                      | ----       | C-H...O <sup>2F</sup>       | D...D     |
|                                   | 3.525*                            | 87.4                       | ----       | C-Cl... $\pi$ <sup>2F</sup> | D...D     | 3.574                             | 86.1                       | ----       | C-Br... $\pi$ <sup>2F</sup> | D...D     | 3.492                                     | 102.9                      | ----       | C-Br... $\pi$ <sup>2F</sup> |           |
| Layer                             |                                   |                            |            |                             |           |                                   |                            |            |                             |           |                                           |                            |            |                             |           |
| DD <sup>L</sup>                   | 3.379                             | 2.3 (Ph-Qn)/0              | $\pi\pi$   |                             |           | 3.400                             | 3.8 (Ph-Qn)/0              | $\pi\pi$   |                             |           | 3.382                                     | 11.0 (Ph-Qn)/0             | $\pi\pi$   |                             |           |
| 2 x DD <sup>L</sup>               | 3.630*                            | 88.3                       | ----       | C-Cl... $\pi$               | D...D     | 3.686*                            | 69.3                       | ----       | C-Br... $\pi$               | D...D     | 3.738*                                    | 83.3                       | ----       | C-Br... $\pi$               | D...D     |
| interLayer                        |                                   |                            |            |                             |           |                                   |                            |            |                             |           |                                           |                            |            |                             |           |
| DD <sup>IL</sup> <sub>1</sub>     |                                   |                            | no overlap |                             |           |                                   |                            | no overlap |                             |           | 3.568                                     | 0 (Ph-Ph)/0                | $\pi\pi$   |                             |           |
|                                   | 2.927                             | 158.9                      | ----       | C-Cl...H <sup>2F</sup>      | D...D     | 2.956                             | 160.9                      | ----       | C-Br...H <sup>2F</sup>      | D...D     | 2.986                                     | 160.5                      | ----       | C-Br...H <sup>2F</sup>      | D...D     |
| DD <sup>IL</sup> <sub>2</sub>     | 3.370                             | 35.1                       | no overlap | C...C                       |           | 3.378                             | 35.9                       | no overlap | C...C                       |           | 3.711*                                    | 45.5                       | no overlap | C...C                       |           |
| 2 x DD <sup>IL</sup> <sub>2</sub> | 3.297                             | 125.5                      | ----       | C-Cl... $\pi$               | D...D     | 3.372                             | 124.5                      | ----       | C-Br... $\pi$               | D...D     | 2.642                                     | 150.3                      | ----       | C-H... $\pi$                | D...D     |

<sup>a</sup>, DD interactions within the dimers (DD<sup>d</sup> or DD<sup>d</sup><sub>x</sub>), the layers (DD<sup>L</sup> or DD<sup>L</sup><sub>x</sub>) and interlayer (DD<sup>IL</sup> or DD<sup>IL</sup><sub>x</sub>)

*d*, interatomic separation of the contacts or distance between the average planes of the ligands in the case of  $\pi\pi$  interactions

$\alpha$ , angle of the contact or angle between the average planes (in the case of  $\pi\pi$  interactions)

**overlap**, characterization of the  $\pi\pi$  overlap.

L-L corresponds to the overlap over the entire length of the ligand (with two overlaps between the Ph and Qn groups).

**Qn-Qn** overlap of two Qn groups; **Ph-Ph** overlap between two Ph groups and **Ph-Qn** overlap between a Ph and Qn.

The index <sup>I/II</sup> refers to the number of overlapping rings. Only observed in the case of L-L or Qn-Qn. In the case of the contacts involving the Ph groups only one ring may overlap.

The numerical value corresponds to an estimation of the extension of the overlap (as the fraction of the area of the overlap vs. the area of one ring)

**contact**, characterization of the contact (the superscript 2F concerns two fold contacts)

**Int. cat.**, interacting cations

\*slightly elongated contacts, exceeding the sum of the van der Waals radii by 2%, or 5% in case of  $\pi\pi$  contacts

**Colour Code:** **Red** corresponds to  $\pi\pi$  interactions, **Blue** corresponds to hydrogen bonds, **Purple** corresponds to halogen bonds.

Table S3. continued

|                              | 3.BF4 (150K)       |                           |          |                             |                                  | 3.ClO4 (150K)      |                           |          |                             |                                  | 4.ClO4 (150K)      |                           |          |                             |                                  |
|------------------------------|--------------------|---------------------------|----------|-----------------------------|----------------------------------|--------------------|---------------------------|----------|-----------------------------|----------------------------------|--------------------|---------------------------|----------|-----------------------------|----------------------------------|
|                              | LS                 |                           |          |                             |                                  | LS                 |                           |          |                             |                                  | LS                 |                           |          |                             |                                  |
| Dimer                        | <i>d</i> (Å)       | $\alpha$ (°)              | overlap  | contact                     | Int. cat.                        | <i>d</i> (Å)       | $\alpha$ (°)              | overlap  | type                        | Int. cat.                        | <i>d</i> (Å)       | $\alpha$ (°)              | overlap  | contact                     | Int. cat.                        |
| DD <sup>d</sup> <sub>A</sub> | 3.330              | 0 (L-L) <sup>I</sup> /0.5 | $\pi\pi$ |                             |                                  | 3.354              | 0 (L-L) <sup>I</sup> /0.5 | $\pi\pi$ |                             |                                  | 3.301              | 0 (L-L) <sup>I</sup> /0.5 | $\pi\pi$ |                             |                                  |
|                              | 2.777 <sup>*</sup> | 150.7                     | ----     | C-H...O <sup>2F</sup>       |                                  | 2.750              | 144.1                     | ----     | C-H...O <sup>2F</sup>       |                                  | 2.736              | 141.9                     | ----     | C-H...O <sup>2F</sup>       |                                  |
|                              | 3.349              | 81.4                      | ----     | C-Cl... $\pi$ <sup>2F</sup> | D <sub>A</sub> ...D <sub>A</sub> | 3.336              | 82.8                      | ----     | C-Cl... $\pi$ <sup>2F</sup> | D <sub>A</sub> ...D <sub>A</sub> | 3.434              | 101.7                     | ----     | C-Br... $\pi$ <sup>2F</sup> | D <sub>A</sub> ...D <sub>A</sub> |
| DD <sup>d</sup> <sub>B</sub> | 3.537              | 0 (L-L) <sup>I</sup> /0.1 | $\pi\pi$ |                             | D <sub>B</sub> ...D <sub>B</sub> | 3.482              | 0 (L-L) <sup>I</sup> /0.1 | $\pi\pi$ |                             | D <sub>B</sub> ...D <sub>B</sub> | 3.545              | 0 (L-L) <sup>I</sup> /0.1 | $\pi\pi$ |                             | D <sub>B</sub> ...D <sub>B</sub> |
| Layer                        |                    |                           |          |                             |                                  |                    |                           |          |                             |                                  |                    |                           |          |                             |                                  |
| DD <sup>L</sup> <sub>1</sub> | 3.498              | 8.4 (Ph-Qn)/0             | $\pi\pi$ |                             |                                  | 3.476              | 8.2 (Ph-Qn)/0             | $\pi\pi$ |                             |                                  | 3.480              | 9.5 (Ph-Qn)/0             | $\pi\pi$ |                             |                                  |
|                              | 3.530 <sup>*</sup> | 104.9                     | ----     | C-Cl... $\pi$               | D <sub>A</sub> ...D <sub>B</sub> | 3.604 <sup>*</sup> | 104.1                     | ----     | C-Cl... $\pi$               | D <sub>A</sub> ...D <sub>B</sub> | 3.654 <sup>*</sup> | 89.5                      | 102.1    | C-Br... $\pi$               | D <sub>A</sub> ...D <sub>B</sub> |
| DD <sup>L</sup> <sub>2</sub> | 3.483              | 5.3 (Ph-Qn)/0             | $\pi\pi$ |                             |                                  | 3.493              | 4.9 (Ph-Qn)/0             | $\pi\pi$ |                             |                                  | 3.413              | 6.3 (Ph-Qn)/0             | $\pi\pi$ |                             |                                  |
|                              | 2.930              | 146.3                     | ----     | C-H... $\pi$                |                                  | 3.038 <sup>*</sup> | 145.6                     | ----     | C-H... $\pi$                |                                  | 3.082 <sup>*</sup> | 143.0                     | ----     | C-H... $\pi$                |                                  |
|                              | 2.949              | 158.2                     | ----     | C-H... $\pi$                | D <sub>A</sub> ...D <sub>B</sub> | 2.985 <sup>*</sup> | 157.4                     | ----     | C-H... $\pi$                | D <sub>A</sub> ...D <sub>B</sub> | 3.015 <sup>*</sup> | 159.4                     | ----     | C-H... $\pi$                | D <sub>A</sub> ...D <sub>B</sub> |
| interLayer                   |                    |                           |          |                             |                                  |                    |                           |          |                             |                                  |                    |                           |          |                             |                                  |
| DD <sup>L</sup> <sub>1</sub> | 3.267              | 0 (Ph-Ph)/0               | $\pi\pi$ |                             |                                  | 3.255              | 0 (Ph-Ph)/0               | $\pi\pi$ |                             |                                  | 3.267              | 0 (Ph-Ph)/0               | $\pi\pi$ |                             |                                  |
|                              | 3.259              | 138.8                     | ----     | C-Cl... $\pi$ <sup>2F</sup> | D <sub>A</sub> ...D <sub>A</sub> | 3.257              | 137.0                     | ----     | C-Cl... $\pi$ <sup>2F</sup> | D <sub>A</sub> ...D <sub>A</sub> | 3.350              | 135.5                     | ----     | C-Br... $\pi$ <sup>2F</sup> | D <sub>A</sub> ...D <sub>A</sub> |
| DD <sup>L</sup> <sub>2</sub> | 3.382              | 4.4 (Ph-Ph)/0             | $\pi\pi$ |                             |                                  | 3.388              | 4.4 (Ph-Ph)/0             | $\pi\pi$ |                             |                                  | 3.470              | 3.4 (Ph-Ph)/0             | $\pi\pi$ |                             |                                  |
|                              | 3.445              | 90.8                      | ----     | C-Cl... $\pi$               | D <sub>A</sub> ...D <sub>B</sub> | 3.462              | 83.5                      | ----     | C-Cl... $\pi$               | D <sub>A</sub> ...D <sub>B</sub> | 3.519              | 91.1                      | ----     | C-Br... $\pi$               | D <sub>A</sub> ...D <sub>B</sub> |
| DD <sup>L</sup> <sub>3</sub> | 3.614 <sup>*</sup> | 0 (Ph-Ph)/0               | $\pi\pi$ |                             |                                  | 3.833 <sup>*</sup> | 0 (Ph-Ph)/0               | $\pi\pi$ |                             |                                  | 3.627 <sup>*</sup> | 0 (Ph-Ph)/0               | $\pi\pi$ |                             |                                  |
|                              | 3.279              | 134.7                     | ----     | C-Cl... $\pi$ <sup>2F</sup> | D <sub>B</sub> ...D <sub>B</sub> | 3.335              | 129.8                     | ----     | C-Cl... $\pi$ <sup>2F</sup> | D <sub>B</sub> ...D <sub>B</sub> | 3.374              | 131.8                     | ----     | C-Br... $\pi$ <sup>2F</sup> | D <sub>B</sub> ...D <sub>B</sub> |
| DD <sup>L</sup> <sub>4</sub> | 3.632 <sup>*</sup> | 0 (Qn-Qn) <sup>I</sup> /  | $\pi\pi$ |                             | D <sub>B</sub> ...D <sub>B</sub> | 3.599 <sup>*</sup> | 0 (Qn-Qn) <sup>I</sup> /  | $\pi\pi$ |                             | D <sub>B</sub> ...D <sub>B</sub> | 3.596 <sup>*</sup> | 0 (Qn-Qn) <sup>I</sup> /  | $\pi\pi$ |                             | D <sub>B</sub> ...D <sub>B</sub> |

<sup>a</sup>, DD interactions within the dimers (DD<sup>d</sup> or DD<sup>d</sup><sub>x</sub>), the layers (DD<sup>L</sup> or DD<sup>L</sup><sub>x</sub>) and interlayer (DD<sup>L</sup> or DD<sup>L</sup><sub>x</sub>)

*d*, interatomic separation of the contacts or distance between the average planes of the ligands (in the case of  $\pi\pi$  interactions)

$\alpha$ , angle of the contact or angle between the average planes (in the case of  $\pi\pi$  interactions)

**overlap**, characterization of the  $\pi\pi$  overlap.

L-L corresponds to the overlap over the entire length of the ligand (with two overlaps between the Ph and Qn groups).

**Qn-Qn** overlap of two Qn groups; **Ph-Ph** overlap between two Ph groups and **Ph-Qn** overlap between a Ph and Qn.

The index <sup>I/I</sup> refers to the number of overlapping rings. Only observed in the case of L-L or Qn-Qn. In the case of the contacts involving the Ph groups only one ring may overlap.

The numerical value corresponds to an estimation of the extension of the overlap (as the fraction of the area of the overlap vs. the area of one ring)

**contact**, characterization of the contact (the superscript 2F concerns two fold contacts)

**Int. cat.**, interacting cations

\*slightly elongated contacts, exceeding the sum of the van der Waals radii by 2%, or 5% in case of  $\pi\pi$  contacts

**Colour Code:** Red corresponds to  $\pi\pi$  interactions, Blue corresponds to hydrogen bonds, Purple corresponds to halogen bonds.

Table S4. Key parameters describing the DD contacts in the crystal structures of the salts with type II Dimer Layers supramolecular configuration.

| <sup>a</sup>                 | 4.SCN.2H <sub>2</sub> O (150K) |                            |          |                            |           | 5.Cl.MeOH.3H <sub>2</sub> O (150K) |                            |          |                            |           |
|------------------------------|--------------------------------|----------------------------|----------|----------------------------|-----------|------------------------------------|----------------------------|----------|----------------------------|-----------|
|                              | HS                             |                            |          |                            |           | HS                                 |                            |          |                            |           |
| Dimer                        | <i>d</i> (Å)                   | $\alpha$ (°)               | overlap  | contact                    | Int. cat. | <i>d</i> (Å)                       | $\alpha$ (°)               | overlap  | contact                    | Int. cat. |
| DD <sup>d</sup>              | 3.549                          | 0 (L-L) <sup>II</sup> /0.7 | $\pi\pi$ |                            |           | 3.459                              | 0 (L-L) <sup>II</sup> /0.5 | $\pi\pi$ |                            |           |
|                              | 2.622                          | 146.8                      | ----     | C-H...O <sup>2F</sup>      |           | 2.625                              | 152.0                      | ----     | C-H...O <sup>2F</sup>      | D...D     |
|                              | 2.692                          | 142.6                      | ----     | C-H...O <sup>2F</sup>      | D...D     |                                    |                            |          |                            |           |
| Layer                        |                                |                            |          |                            |           |                                    |                            |          |                            |           |
| DD <sup>L</sup> <sub>1</sub> | 3.377                          | 0 (Qn-Qn) <sup>II</sup>    | $\pi\pi$ |                            |           | 3.426                              | 0 (Qn-Qn) <sup>II</sup>    | $\pi\pi$ |                            |           |
|                              | 2.799                          | 159.7                      | ----     | C-H... $\pi$ <sup>2F</sup> |           | 2.720                              | 157.3                      | ----     | C-H... $\pi$ <sup>2F</sup> |           |
|                              | 2.717                          | 167.1                      | ----     | C-H... $\pi$ <sup>2F</sup> | D...D     | 2.944                              | 154.2                      | ----     | C-H... $\pi$ <sup>2F</sup> | D...D     |
| DD <sup>L</sup> <sub>2</sub> | 3.392                          | 0 (Qn-Qn) <sup>II</sup>    | $\pi\pi$ |                            | D...D     | 3.424                              | 0 (Qn-Qn) <sup>II</sup>    | $\pi\pi$ |                            | D...D     |
| interLayer                   |                                |                            |          |                            |           |                                    |                            |          |                            |           |
| DD <sup>iL</sup>             | 3.502                          | 0 (Ph-Ph)/(                | $\pi\pi$ |                            |           | 3.581 <sup>*</sup>                 | 0 (Ph-Ph)/(                | $\pi\pi$ |                            |           |
|                              | 3.113                          | 155.0                      | ----     | C-Br...O <sup>2F</sup>     | D...D     | 3.243                              | 151.5                      | ----     | C-I...O <sup>2F</sup>      | D...D     |

<sup>a</sup>, DD interactions within the dimers (DD<sup>d</sup> or DD<sup>d<sub>x</sub></sup>), the layers (DD<sup>L</sup> or DD<sup>L<sub>x</sub></sup>) and interlayer (DD<sup>iL</sup> or DD<sup>iL<sub>x</sub></sup>)  
*d*, interatomic separation of the contacts or distance between the average planes of the ligands in the case of  $\pi\pi$  interactions

$\alpha$ , angle of the contact or angle between the average planes in the case of  $\pi\pi$  interactions.

**overlap**, characterization of the  $\pi\pi$  overlap.

L-L corresponds to the overlap over the entire length of the ligand (with two overlaps between the Ph and Qn groups).

**Qn-Qn** overlap of two Qn groups; **Ph-Ph** overlap between two Ph groups and **Ph-Qn** overlap between a Ph and Qn.

The index <sup>I/II</sup> refers to the number of overlapping rings. Only observed in the case of L-L or Qn-Qn. In the case of the contacts involving the Ph groups only one ring may overlap.

The numerical value corresponds to an estimation of the extension of the overlap (as the fraction of the area of the overlap vs. the area of one ring)

**contact**, characterization of the contact (the superscript 2F concerns two fold contacts)

**Int. cat.**, interacting cations

\*slightly elongated contacts, exceeding the sum of the van der Waals radii by 2%, or 5% in case of  $\pi\pi$  contacts

**Colour Code:** Red corresponds to  $\pi\pi$  interactions, Blue corresponds to hydrogen bonds, Purple corresponds to halogen bonds.

Table S5. Key parameters describing the DD contacts in the crystal structures of **3.PF<sub>6</sub>.MeCN**, **4.PF<sub>6</sub>.H<sub>2</sub>O** and **5.PF<sub>6</sub>.2H<sub>2</sub>O**, with the Chain Layers supramolecular configuration

| a                                 | 3.PF6.MeCN (150K)  |                            |         |                        |           | 4.PF6.H2O (150K)   |                            |         |                        |           | 5.PF6.1.5H2O (150K) |                            |          |                       |           |
|-----------------------------------|--------------------|----------------------------|---------|------------------------|-----------|--------------------|----------------------------|---------|------------------------|-----------|---------------------|----------------------------|----------|-----------------------|-----------|
|                                   | LS                 | Tc=265K                    | Sharp   |                        |           | LS                 | Tc=220K                    | ~ Sharp |                        |           | LS                  | Tc=270K                    | V. Sharp |                       |           |
| Chain                             | d (Å)              | α (°)                      | overlap | contact                | Int. cat. | d (Å)              | α (°)                      | overlap | contact                | Int. cat. | d (Å)               | α (°)                      | overlap  | contact               | Int. cat. |
| DD <sup>Ch</sup> <sub>1</sub>     | 3.322              | 0 (L-L) <sup>II</sup> /0.5 | ππ      |                        |           | 3.318              | 0 (L-L) <sup>II</sup> /0.5 | ππ      |                        |           | 3.322               | 0 (L-L) <sup>II</sup> /0.5 | ππ       |                       |           |
|                                   | 2.624              | 148.3                      | ----    | C-H...O <sup>2F</sup>  |           | 2.526              | 150.6                      | ----    | C-H...O <sup>2F</sup>  |           | 2.493               | 150.4                      | ----     | C-H...O <sup>2F</sup> |           |
|                                   | 3.516              | 77.1                       | ----    | C-Cl...π <sup>2F</sup> | D...D     | 3.590              | 91.9                       | ----    | C-Br...π <sup>2F</sup> | D...D     | 3.700               | 88.2                       | ----     | C-I...π <sup>2F</sup> | D...D     |
| DD <sup>Ch</sup> <sub>2</sub>     | 3.504              | 0 (L-L) <sup>II</sup> /0.5 | ππ      |                        |           | 3.441              | 0 (L-L) <sup>II</sup> /0.5 | ππ      |                        |           | 3.449               | 0 (L-L) <sup>II</sup> /0.5 | ππ       |                       |           |
|                                   | 2.680              | 147.8                      | ----    | C-H...O <sup>2F</sup>  |           | 2.741              | 148.4                      | ----    | C-H...O <sup>2F</sup>  |           | 2.738               | 147.1                      | ----     | C-H...O <sup>2F</sup> |           |
|                                   | 3.431              | 83.4                       | ----    | C-Cl...π <sup>2F</sup> | D...D     | 3.579              | 99.6                       | ----    | C-Br...π <sup>2F</sup> | D...D     | 3.657               | 94.7                       | ----     | C-I...π <sup>2F</sup> | D...D     |
| Layer                             |                    |                            |         |                        |           |                    |                            |         |                        |           |                     |                            |          |                       |           |
| DD <sup>L</sup>                   | 3.445              | 0 (Qn-Qn) <sup>I</sup>     | ππ      |                        |           | 3.380              | 0 (Qn-Qn) <sup>I</sup>     | ππ      |                        |           | 3.350               | 0 (Qn-Qn) <sup>I</sup>     | ππ       |                       |           |
|                                   | 2.799              | 150.4                      | ----    | C-H...π <sup>2F</sup>  | D...D     | 2.779              | 162.2                      | ----    | C-H...π <sup>2F</sup>  | D...D     | 2.796               | 145.0                      | ----     | C-H...π <sup>2F</sup> | D...D     |
| interLayer                        |                    |                            |         |                        |           |                    |                            |         |                        |           |                     |                            |          |                       |           |
| DD <sup>iL</sup> <sub>1</sub>     | 3.075 <sup>*</sup> | 152.5                      | ----    | C-H...Cl <sup>2F</sup> |           | 3.131 <sup>*</sup> | 159.2                      | ----    | C-H...Br <sup>2F</sup> |           | 3.192               | 157.0                      | ----     | C-H...I <sup>2F</sup> |           |
|                                   | 2.855              | 137.2                      | ----    | C-H...π <sup>2F</sup>  | D...D     | 3.038 <sup>*</sup> | 143.6                      | ----    | C-H...π <sup>2F</sup>  | D...D     | 3.154 <sup>*</sup>  | 141.6                      | ----     | C-H...π <sup>2F</sup> | D...D     |
| DD <sup>iL</sup> <sub>2</sub>     | 3.618 <sup>*</sup> | 128.3                      | ----    | C-Cl...π               |           | 3.405              | 134.0                      | ----    | C-Br...π               |           | 3.554               | 138.0                      | ----     | C-I...π               |           |
| 2 x DD <sup>iL</sup> <sub>2</sub> | 3.646 <sup>*</sup> | 111.2                      | ----    | C-Cl...π               | D...D     | 3.676 <sup>*</sup> | 113.3                      | ----    | C-Br...π               | D...D     | 3.817 <sup>*</sup>  | 120.5                      | ----     | C-I...π               | D...D     |

<sup>a</sup>, DD interactions within the chains (DD<sup>Ch</sup><sub>x</sub>), the layers (DD<sup>L</sup>) and interlayer (DD<sup>il</sup><sub>L</sub> or DD<sup>il</sup><sub>x</sub>)

*d*, interatomic separation of the contacts or distance between the average planes of the ligands in the case of  $\pi\pi$  interactions

$\alpha$ , angle of the contact or angle between the average planes in the case of  $\pi\pi$  interactions.

**overlap**, characterization of the  $\pi\pi$  overlap.

L-L corresponds to the overlap over the entire length of the ligand (with two overlaps between the Ph and Qn groups).

**Qn-Qn** overlap of two Qn groups.

The index <sup>I/II</sup> refers to the number of overlapping rings. Only observed in the case of L-L or Qn-Qn. In the case of the contacts involving the Ph groups only one ring may overlap.

The numerical value corresponds to an estimation of the extension of the overlap (as the fraction of the area of the overlap vs. the area of one ring)

**contact**, characterization of the contact (the superscript 2F concerns two fold contacts)

**Int. cat.**, interacting cations

\*slightly elongated contacts, exceeding the sum of the van der Waals radii by 2%, or 5% in case of  $\pi\pi$  contacts

**Colour Code:** **Red** corresponds to  $\pi\pi$  interactions, **Blue** corresponds to hydrogen bonds, **Purple** corresponds to halogen bonds.

Table S6. Summary of the parameters characterizing the SCO behavior of the salts with the Chain Layers supramolecular configuration and with HS configurations at room temperature.

| Salt                                                 | RT<br>config | Int.<br>config. | LT<br>config. | $\chi_{T_{RT}}$<br>(emu/<br>mol.K) | SCO<br>Steps | SCO<br>type <sup>s</sup> | $T_{1/2}^1$ (K)<br>$T_{1/2}^2$ (K)  | Ref       |
|------------------------------------------------------|--------------|-----------------|---------------|------------------------------------|--------------|--------------------------|-------------------------------------|-----------|
| <b>1.[Fe(CN)<sub>5</sub>(CO)]MeOH</b>                | HS           | ...             | LS            | 4.1                                | 1 Step       | g (95K)                  | 122                                 | X13       |
|                                                      | HS           | ...             | HS            |                                    | ...          | Blocked                  | ...                                 | ...       |
| <b>1.I<sub>3</sub></b>                               | HS           | ...             | LS            | 3.7                                | 1 Step       | g/Sh (69K)               | 240                                 | X15       |
| <b>1.SCN</b>                                         | HS           | HS (33%)        | LS            | 4.1                                | 2 Step       | Sh (25K)                 | 203 <sup>↓</sup> , 290 <sup>↑</sup> | X17       |
|                                                      | HS           | LS (67%)        | LS            |                                    |              | Sh (25K)                 | 203 <sup>↓</sup> , 210 <sup>↑</sup> |           |
| <b>1.SeCN</b>                                        | HS           | HS (33%)        | LS            | 4.2                                | 2 Step       | VSh (10K)                | 212 <sup>↓</sup> , 282 <sup>↑</sup> | X30       |
|                                                      | HS           | LS (67%)        | LS            |                                    |              | VSh (10K)                | 212 <sup>↓</sup> , 215 <sup>↑</sup> |           |
| <b>3.SCN.MeOH</b>                                    | HS           | HS (50%)        | LS            | 3.2                                | 2 step       | g/Sh (73K)               | 250                                 | X18       |
|                                                      | HS           | LS (50%)        | LS            |                                    |              | Sh (40K)                 | 167 <sup>↓</sup> , 177 <sup>↑</sup> |           |
| <b>3.PF<sub>6</sub>.MeCN</b>                         | HS           | ...             | LS            | 3.8                                | 1 Step       | Sh (44K)                 | 265                                 | this work |
| <b>4.NO<sub>3</sub>.2MeOH</b>                        | HS           | HS (50%)        | LS            | 4.1                                | 2 Step       | VSh (13K)                | 229 <sup>↓</sup> , 234 <sup>↑</sup> | X19       |
|                                                      | HS           | LS (50%)        | LS            |                                    |              | VSh (12K)                | 128 <sup>↓</sup> , 144 <sup>↑</sup> |           |
| <b>4.PF<sub>6</sub>.H<sub>2</sub>O</b>               | HS           | ...             | LS            | 3.6                                | 1 Step       | g/Sh (60K)               | 220                                 | this work |
| <b>5.CF<sub>3</sub>SO<sub>3</sub>.nPrOH</b>          | HS           | ...             | LS            | 4.1                                | 1 Step       | g/Sh (64K)               | 199                                 | X20       |
| <b>5.CF<sub>3</sub>SO<sub>3</sub>.iPOH</b>           | HS           | ...             | LS            | 3.7                                | 1 Step       | g (96K)                  | 251                                 | X20       |
| <b>5.CF<sub>3</sub>SO<sub>3</sub>.MeOH</b>           | HS           | ...             | LS            | 4.2                                | 1 Step       | VSh (8K)                 | 232 <sup>↓</sup> , 234 <sup>↑</sup> | X21       |
| <b>5.CF<sub>3</sub>SO<sub>3</sub>.EtOH</b>           | HS           | ...             | LS            | 4.2                                | ...          | Irrev.                   | ...                                 | X20       |
| <b>5.PF<sub>6</sub>.1.5H<sub>2</sub>O</b>            | HS           | ...             | LS            | 4.2                                | 1 Step       | VSh (4K)                 | 268 <sup>↓</sup> , 272 <sup>↑</sup> | this work |
| <b>5.N(SO<sub>2</sub>CF<sub>3</sub>)<sub>2</sub></b> | HS           | ...             | LS            | 4.2                                | 1 Step       | VSh (7K)                 | 244 <sup>↓</sup> , 278 <sup>↑</sup> | X31       |
| <b>6.Cl.MeCN.H<sub>2</sub>O</b>                      | HS           | HS (50%)        | LS            | 4.2                                | 2 Step       | Sh (21K)                 | 270                                 | X12       |
|                                                      | HS           | LS (50%)        | LS            |                                    |              | VSh (12K)                | 240                                 |           |
| <b>7.Cl.4MeOH. H<sub>2</sub>O</b>                    | HS           | ...             | HS            | 4.1                                | ...          | Blocked                  | ...                                 | X28       |
| <b>7.ClO<sub>4</sub>.MeOH</b>                        | HS           | ...             | HS            | 3.7                                | ...          | Blocked                  | ...                                 | X28       |
| <b>7.NO<sub>3</sub></b>                              | HS           | ...             | HS            | 4.2                                | ...          | Blocked                  | ...                                 | X28       |

$T_{1/2}^1$  and  $T_{1/2}^2$  are the  $T_{1/2}$  observed when T decreases <sup>↓</sup> and when T increases <sup>↑</sup>, when there is hysteresis.

<sup>s</sup> type of transition and degree of cooperativity (g-gradual, g/Sh-gradual/Sharp, Sh-Sharp and VSh-Very Sharp).

The value between brackets ( $\Delta T^*$ , in K) corresponds to the estimated span of the HS→LS transition. considering the slope of  $d\chi T/dT$  at  $T_{1/2}$  and extrapolating it to the  $\chi T^{HS}$  and  $\chi T^{LS}$  limits.

Increasing degree of cooperativity: g (for  $\Delta T^* > 90K$ ); g/Sh ( $50 < \Delta T^* < 90K$ ); Sh ( $15 < \Delta T^* < 50$ ); VSh ( $\Delta T^* < 15$ ).

There are two  $\Delta T$  values,  $\Delta T_{1/2}^1$  (K),  $\Delta T_{1/2}^2$  (K), when SCO takes place in two steps.

Blocked HS configuration; Irrev. Irreversible SCO processes.

Table S7 Summary of the parameters characterizing the octahedral distortion ( $\Sigma$  and  $\theta$ ).

| Compound                               | $\Sigma(^{\circ})$ | $\theta(^{\circ})$ | Spin State | Supramolecular Configuration |
|----------------------------------------|--------------------|--------------------|------------|------------------------------|
| 3.Cl.MeCN.H <sub>2</sub> O             | 42.08              | 63.13              | LS         | Dimer Layers I               |
| 3.ClO <sub>4</sub>                     | 42.54              | 61.01              | LS         | Dimer Layers I               |
|                                        | 53.38              | 72.8               |            |                              |
| 3.BF <sub>4</sub>                      | 40.37              | 56.74              | LS         | Dimer Layers I               |
|                                        | 52.65              | 72.41              |            |                              |
| 3.PF <sub>6</sub> .MeCN                | 42.14              | 61.61              | LS (SCO)   | Chain Layers                 |
| 3.BPh <sub>4</sub>                     | 45.17              | 64.36              | LS         | Dimer Chains                 |
| 4.Cl.MeCN.H <sub>2</sub> O             | 44.18              | 65.52              | LS         | Dimer Layers I               |
| 4.ClO <sub>4</sub>                     | 40.37              | 56.74              | LS         | Dimer Layers I               |
|                                        | 53.48              | 72.18              |            | Dimer Layers I               |
| 4.BF <sub>4</sub> .0.5H <sub>2</sub> O | 49.8               | 80.8               | LS         | Dimer Layers I               |
| 4.PF <sub>6</sub> .H <sub>2</sub> O    | 43.87              | 61.32              | LS (SCO)   | Chain Layers                 |
| 4.BPh <sub>4</sub>                     | 42.59              | 60.94              | LS         | Dimer Chains                 |
| 4.SCN.0.5H <sub>2</sub> O              | 65.62              | 218                | HS         | Dimer Layers II              |
| 5.Cl.MeOH.2.5H <sub>2</sub> O          | 71.27              | 209                | HS         | Dimer Layers II              |
| 5.PF <sub>6</sub> .1.5H <sub>2</sub> O | 45.37              | 63.89              | LS (SCO)   | Chain Layers                 |

$\Sigma$  quantifies the angular deviation from an ideal octahedral geometry and  $\theta$  indicates the distortion from an octahedral towards a trigonal prismatic geometry, both indexes being 0 for an ideal octahedron. Colour code according to the supramolecular configuration: Blue – Type I Dimer layer, Orange – Chain Layers, Purple – Dimer Chain, Green – Type II Dimer Layers.

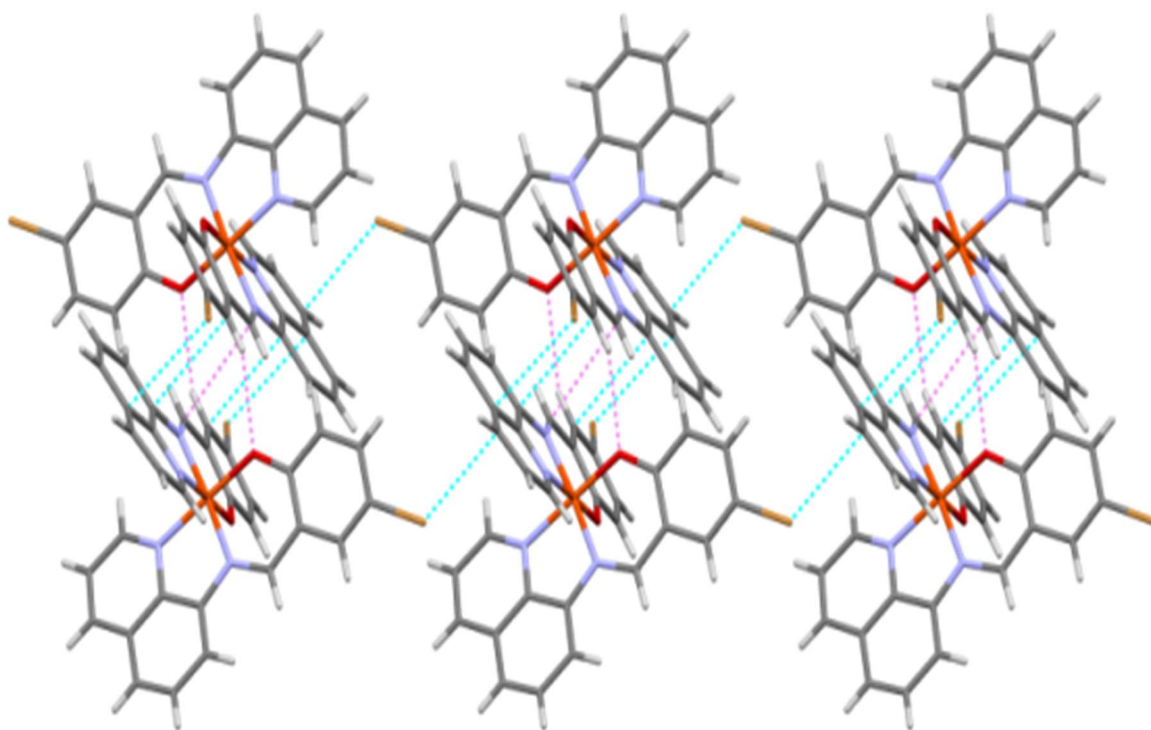

**Figure S1:** Intrachain arrangements of the cations and DD contacts in the crystal structure of **4.BPh<sub>4</sub>**. The short contacts colour code corresponds to the difference,  $\Delta$  in Å, between the distance of the contact and the sum of the van der Waals radii of the involved atoms: violet  $\Delta < -0.1$ ; light blue  $\Delta < 0.0$ .

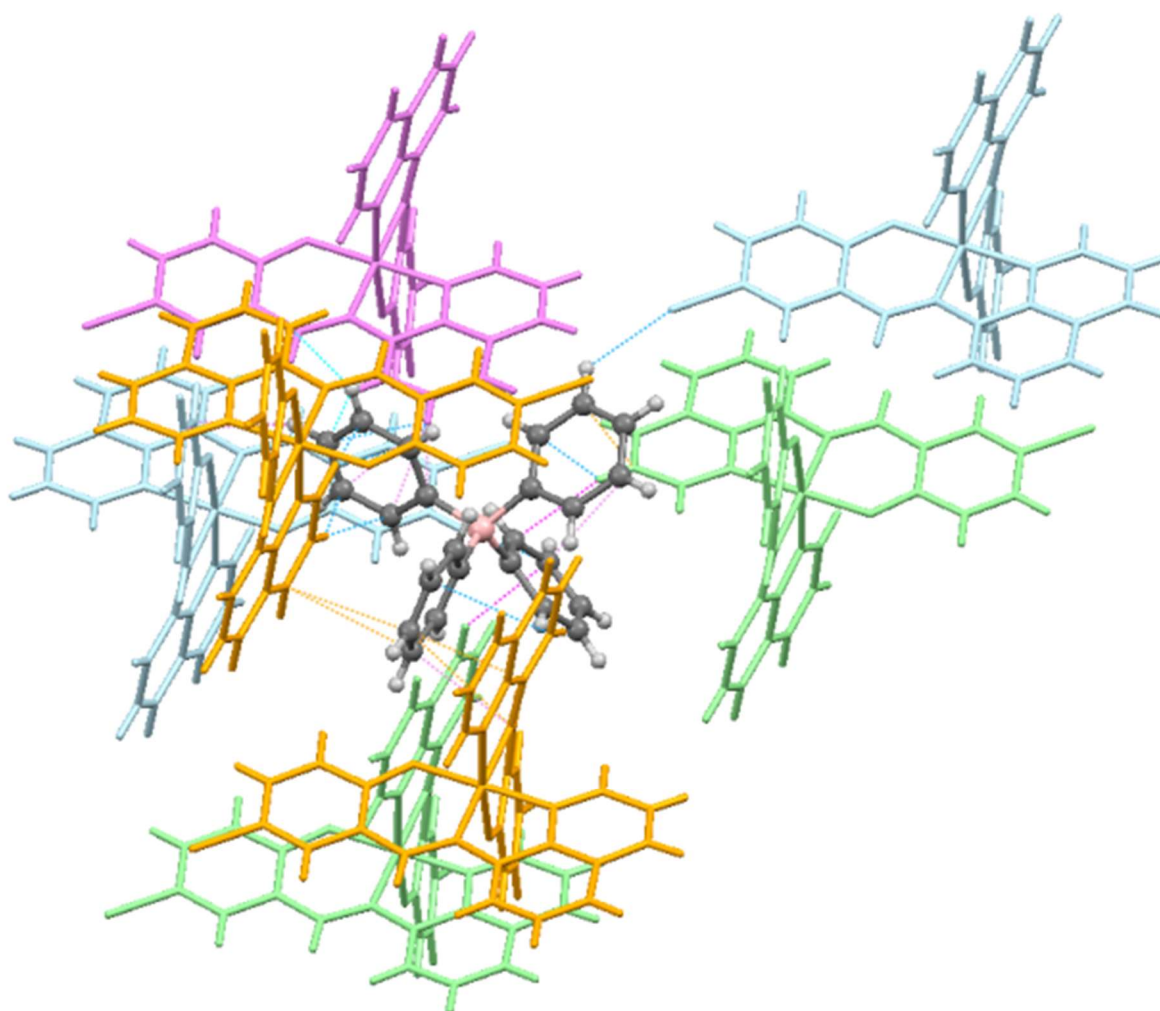

**Figure S2:** Top view of **4.BPh<sub>4</sub>** showing the most relevant DA contacts arrangement around one anion with cations from three neighbouring cationic chains. The cations in orange show  $\pi\pi$  contacts to the Ph groups of the anion, those in light green show strong CH... $\pi$  contacts to the anion and the ones depicted in light blue display weaker DA contacts. The short contacts colour code corresponds to the difference,  $\Delta$  in Å, between the distance of the contact and the sum of the van der Waals radii of the involved atoms: magenta  $\Delta < -0.2$ ; violet  $\Delta < -0.1$ ; light blue  $\Delta < 0.0$ ; orange  $\Delta < 0.1$ ).



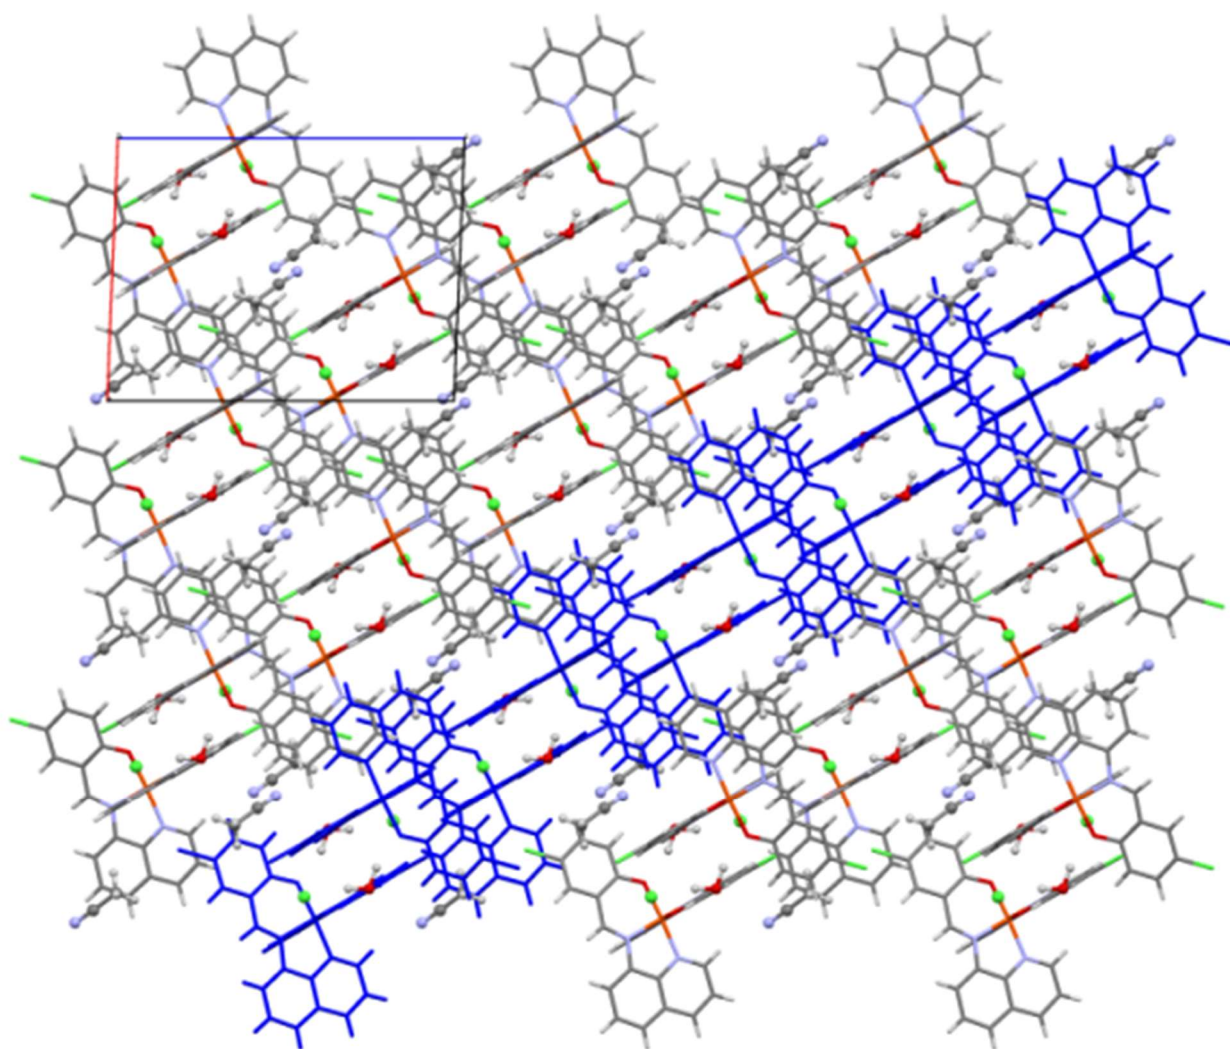

**Figure S3:** View of the crystal structure of **3.Cl.MeCN.H<sub>2</sub>O** along *b*. The cations belonging to one of the cationic layers are depicted in dark blue.

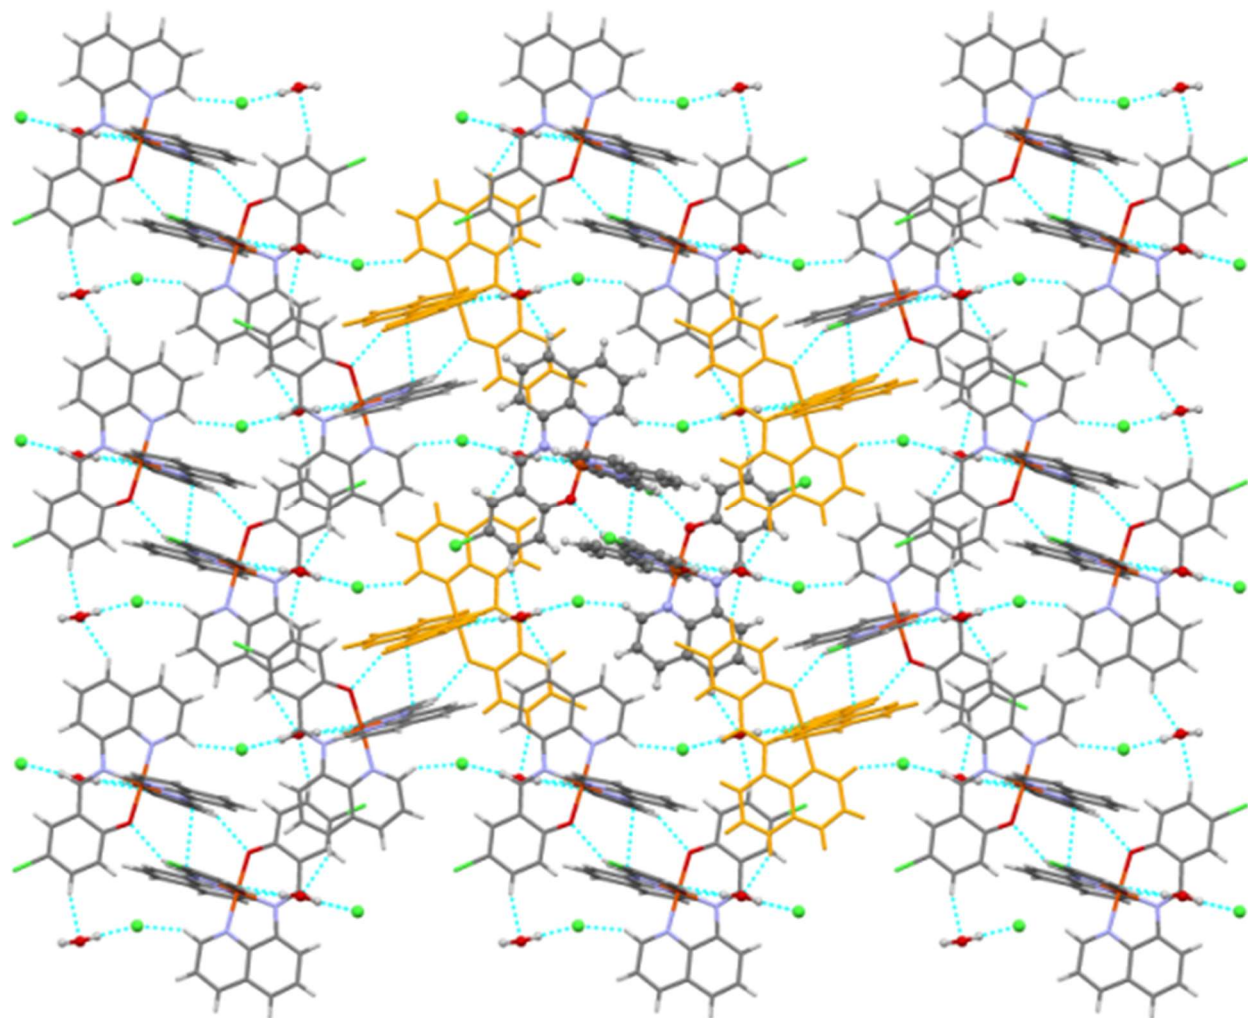

**Figure S4:** Arrangement of the cations, anions and H<sub>2</sub>O molecules within one layer of **3.Cl.MeCN.H<sub>2</sub>O** . The four cations in orange show  $\pi\pi$  DD interactions with the central cationic dimer. Only contacts shorter than the sum of the van der Waals radii are observed, shown in light blue according to the colour code of the other figures.

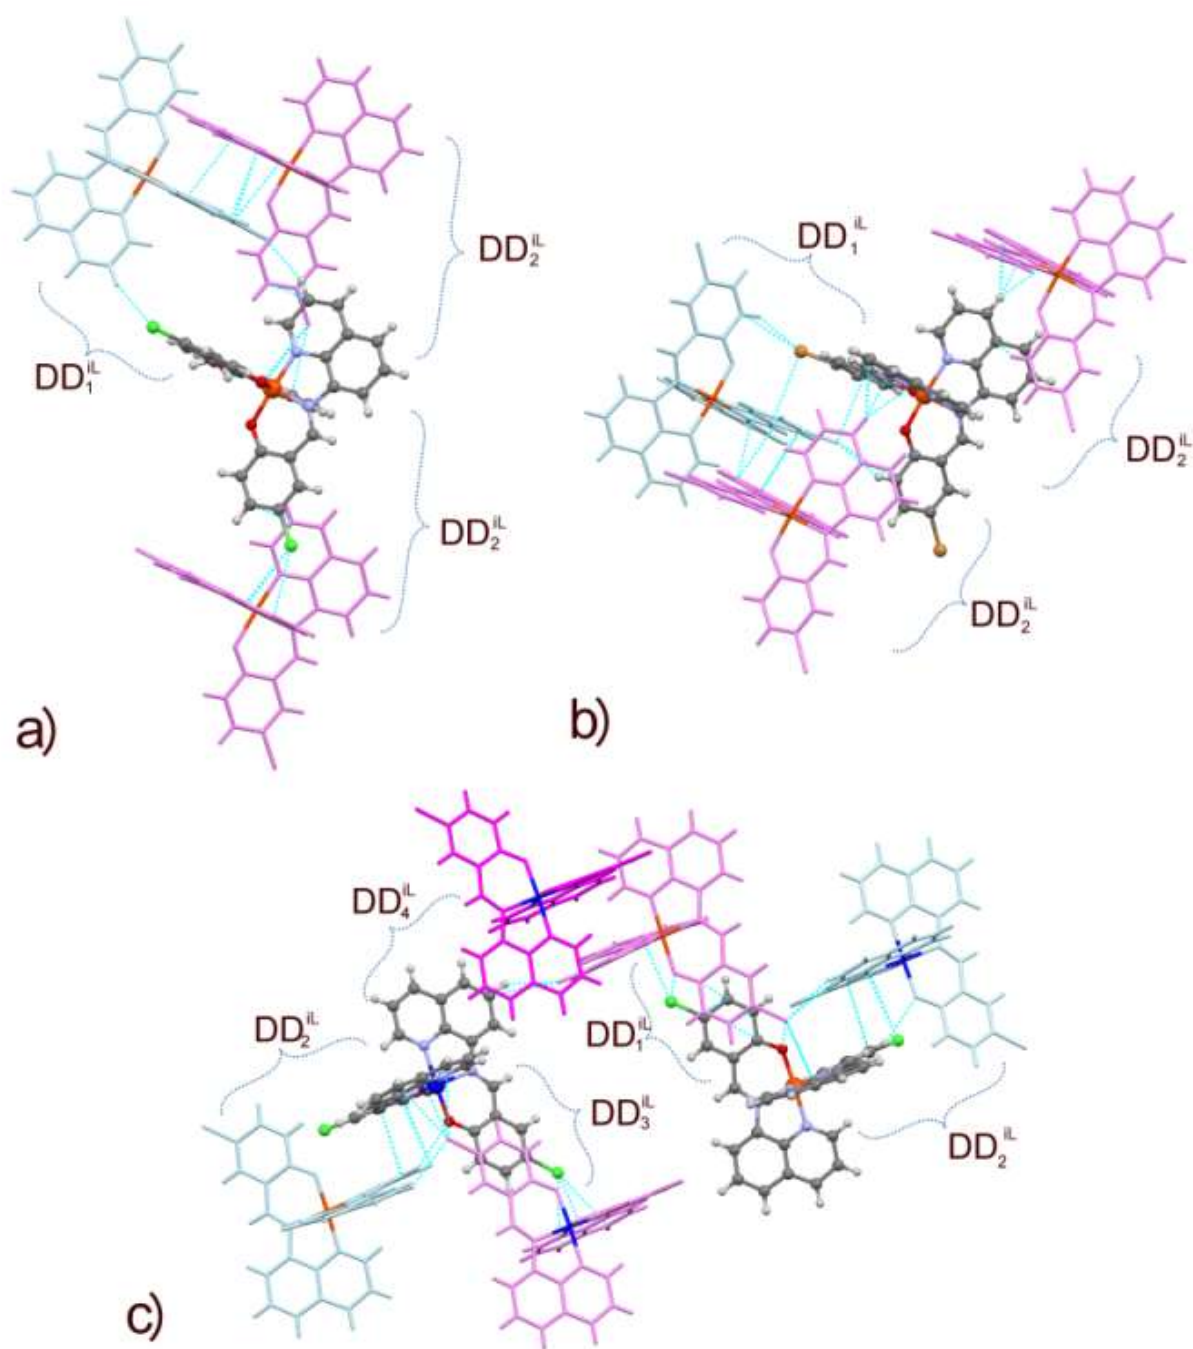

**Figure S5:** View of the interlayer DD contacts and arrangements of the  $[\text{Fe}(5\text{-X-qsal})_2]^+$  cations relative to a central cation (in the default colour scheme) for **3.Cl.MeCN.H<sub>2</sub>O** (a), **4.BF<sub>4</sub>.H<sub>2</sub>O** (b) and **3.ClO<sub>4</sub>** (c). Only contacts shorter than the sum of the van der Waals radii are observed, shown in light blue according to the colour code of the other figures.

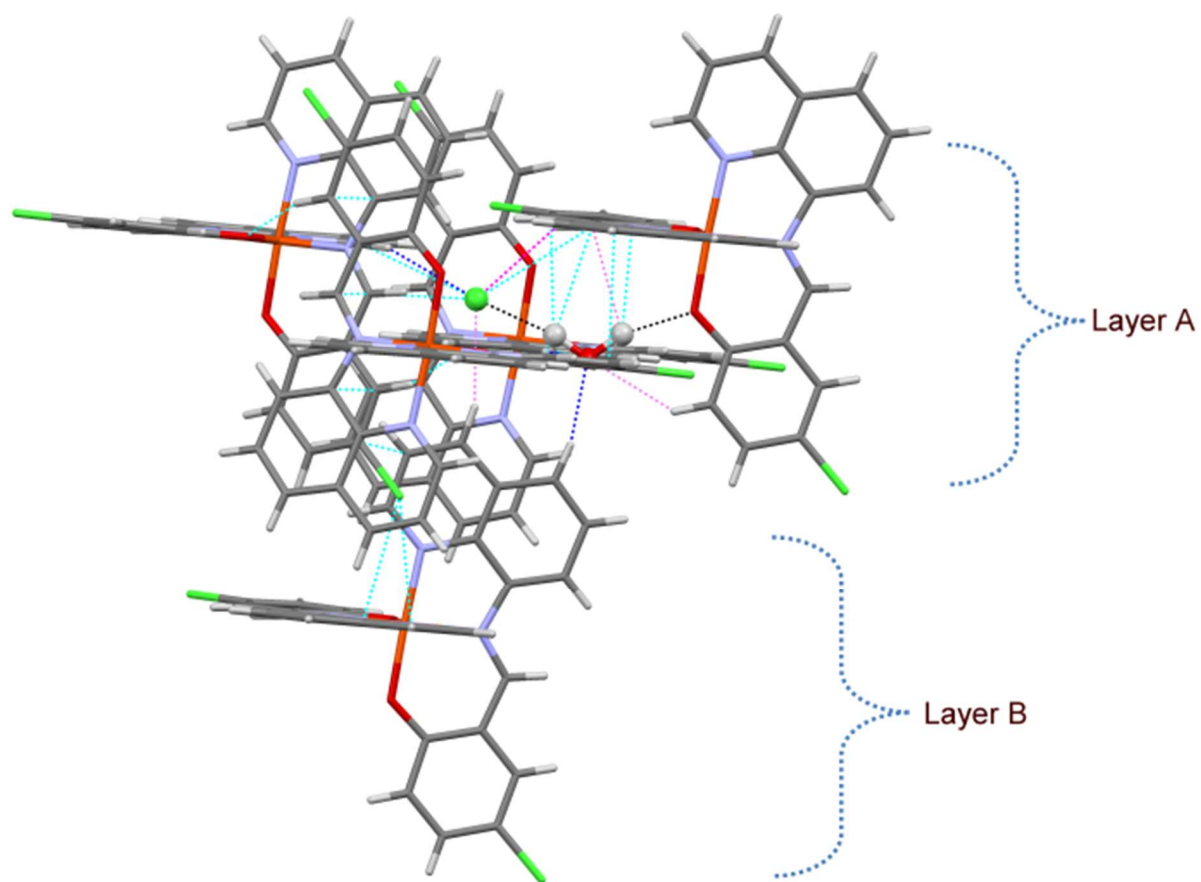

**Figure S6:** Indirect (D...X...D) connectivity mediated by one strongly coupled Cl $\cdots$ H $_2$ O pair in **3.Cl·MeCN·H $_2$ O**. The short contacts colour code corresponds to the difference,  $\Delta$  in Å, between the distance of the contact and the sum of the van der Waals radii of the involved atoms: black  $\Delta < -0.5$ ; dark blue  $\Delta < -0.3$ , magenta  $\Delta < -0.2$ ; violet  $\Delta < -0.1$ ; light blue  $\Delta < 0.0$ .



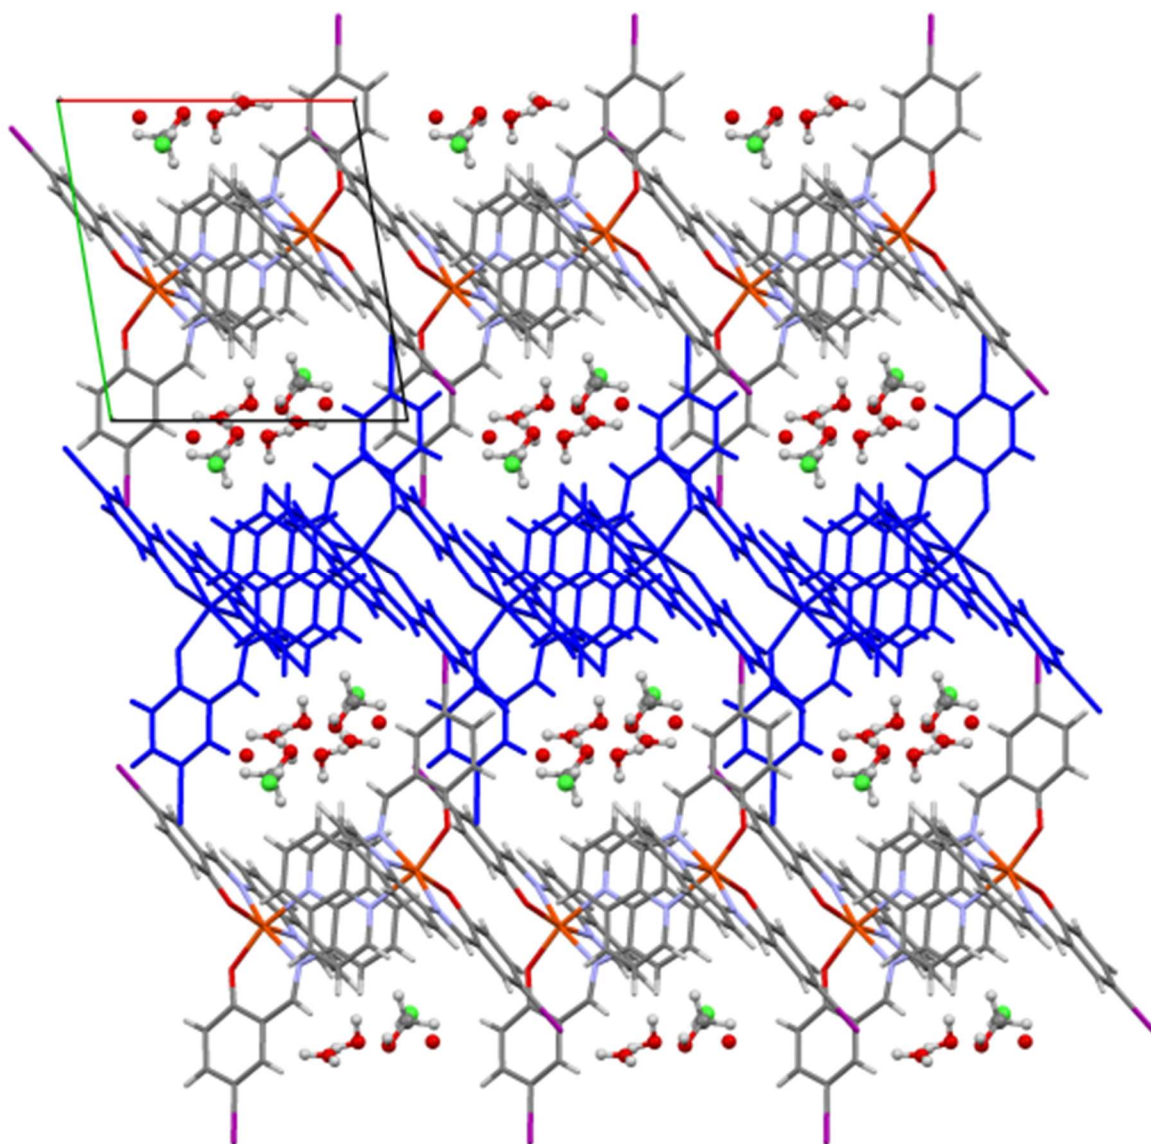

**Figure S7:** View of the crystal structure of **5.Cl.MeOH.3H<sub>2</sub>O** along *c*. The cations belonging to one of the cationic layers are depicted in dark blue.

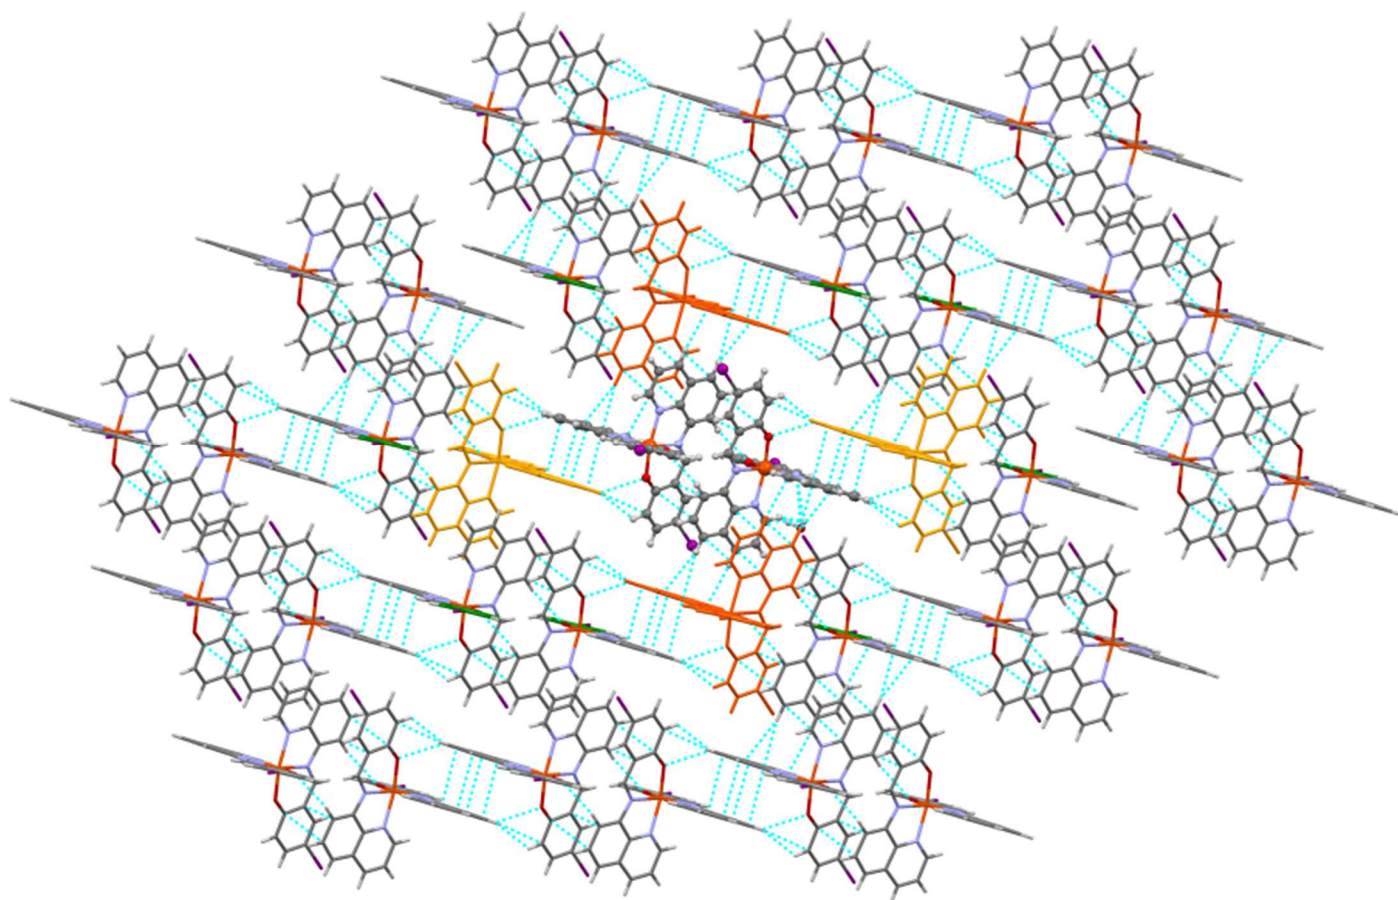

**Figure S8:** Arrangement of the cations within one layer of **5.Cl.MeOH.3H<sub>2</sub>O**. The four cations in orange show strong  $\pi\pi$  DD interactions with the central cationic dimer. The cations in darker orange correspond to cations with even stronger DD interactions,  $DD^{il}_1$ , where the  $\pi\pi$  interactions are reinforced by strong two fold CH... $\pi$  interactions. Only contacts shorter than the sum of the van der Waals radii are observed, shown in light blue according to the colour code of the other figures.

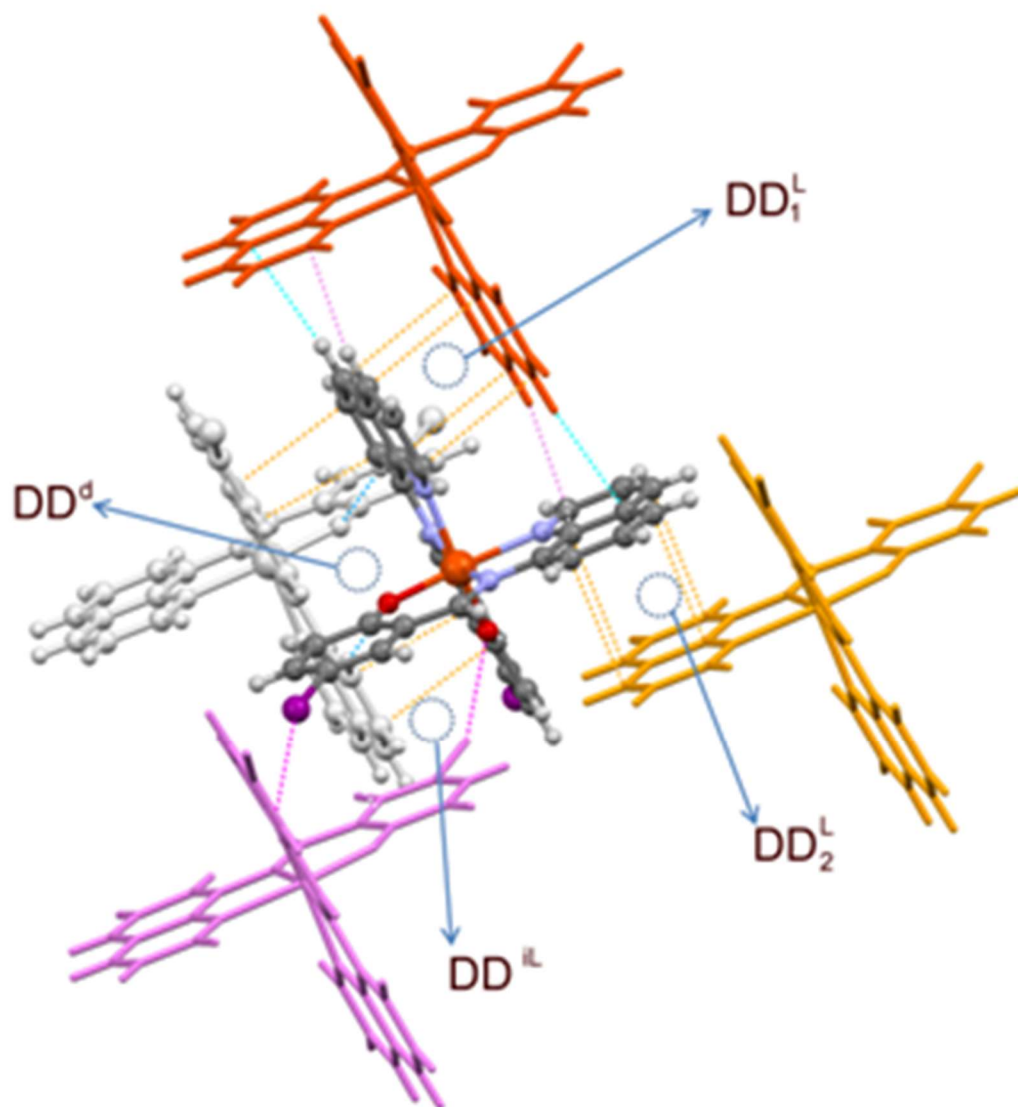

**Figure S9:** View of the DD contacts and arrangements of the  $[\text{Fe}(5\text{-I-qsal})_2]^+$  cations relative to a central cation (in the default colour scheme) for **5.Cl.MeOH.3H<sub>2</sub>O**. The short contacts colour code corresponds to the difference,  $\Delta$  in Å, between the distance of the contact and the sum of the van der Waals radii of the involved atoms: magenta  $\Delta < -0.2$ ; violet  $\Delta < -0.1$ ; light blue  $\Delta < 0.0$ ; orange  $\Delta < 0.1$ .

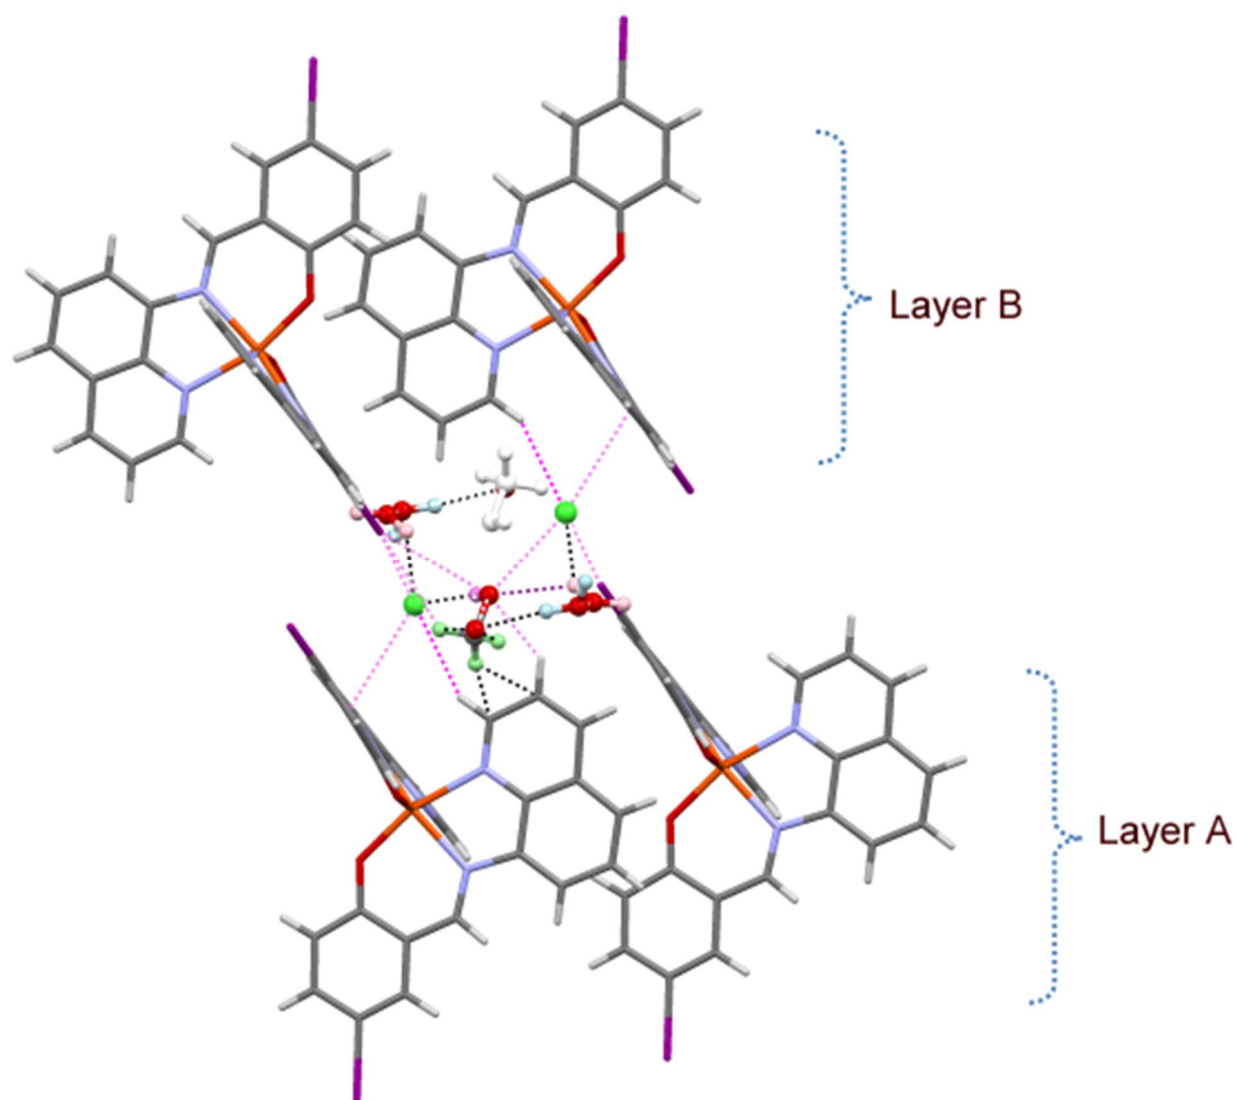

**Figure S10:** Indirect D...X...D connectivity in **5.Cl.MeOH.3H<sub>2</sub>O** mediated by strongly coupled aggregates containing two Cl<sup>-</sup> anions, six H<sub>2</sub>O molecules and one methanol molecule with two possible locations. In one of those locations the MeOH atoms are depicted in light grey and its contacts are omitted. The short contacts colour code corresponds to the difference,  $\Delta$  in Å, between the distance of the contact and the sum of the van der Waals radii of the involved atoms: black  $\Delta < -0.5$ ; dark blue  $\Delta < -0.3$ ; magenta  $\Delta < -0.2$ ; violet  $\Delta < -0.1$ .



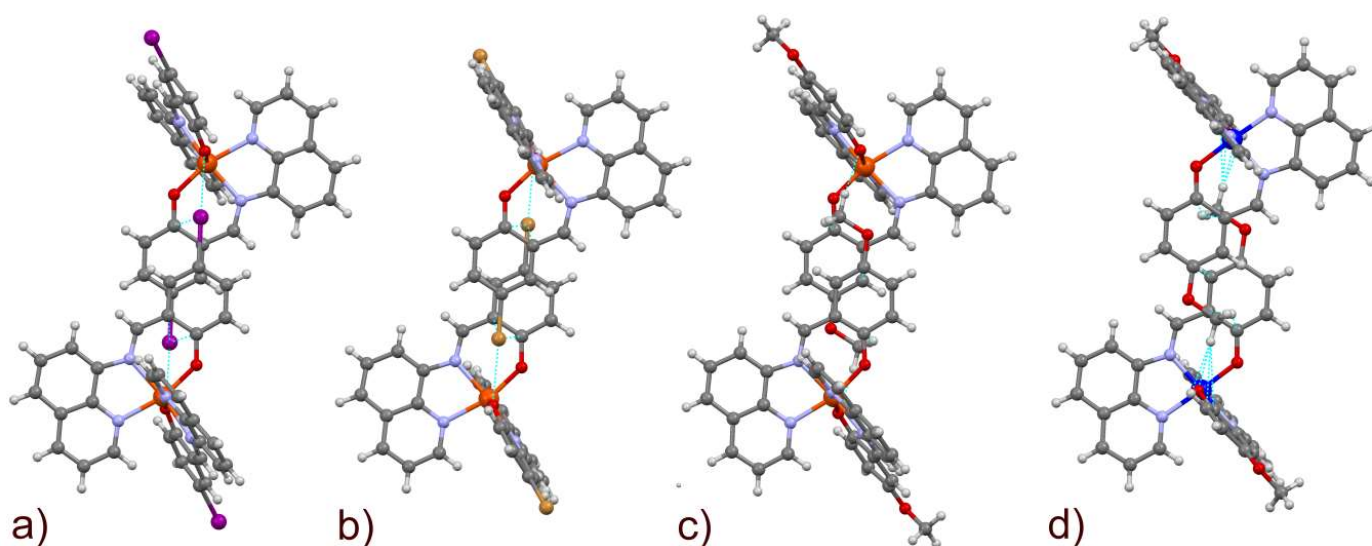

**Figure S11:** View of the overlaps between the Ph-X groups in the DD interlayer interactions,  $DD^{iL}$ , in **5Cl.MeOH.3H<sub>2</sub>O** (a), **4SCN.0.5H<sub>2</sub>O** (b), **6Cl.2MeOH.0.5H<sub>2</sub>O** HS (c) and **6Cl.2MeOH.0.5H<sub>2</sub>O** LS (d).. View of the overlaps between the Ph-X groups in the DD interlayer interactions,  $DD^{iL}$ , in **5Cl.MeOH.3H<sub>2</sub>O** (a), **4SCN.0.5H<sub>2</sub>O** (b), **6Cl.2MeOH.0.5H<sub>2</sub>O** HS (c) and **6Cl.2MeOH.0.5H<sub>2</sub>O** LS (d). The short contacts colour code corresponds to the difference,  $\Delta$  in Å, between the distance of the contact and the sum of the van der Waals radii of the involved atoms: violet  $\Delta < -0.1$ ; light blue  $\Delta < 0.0$ .

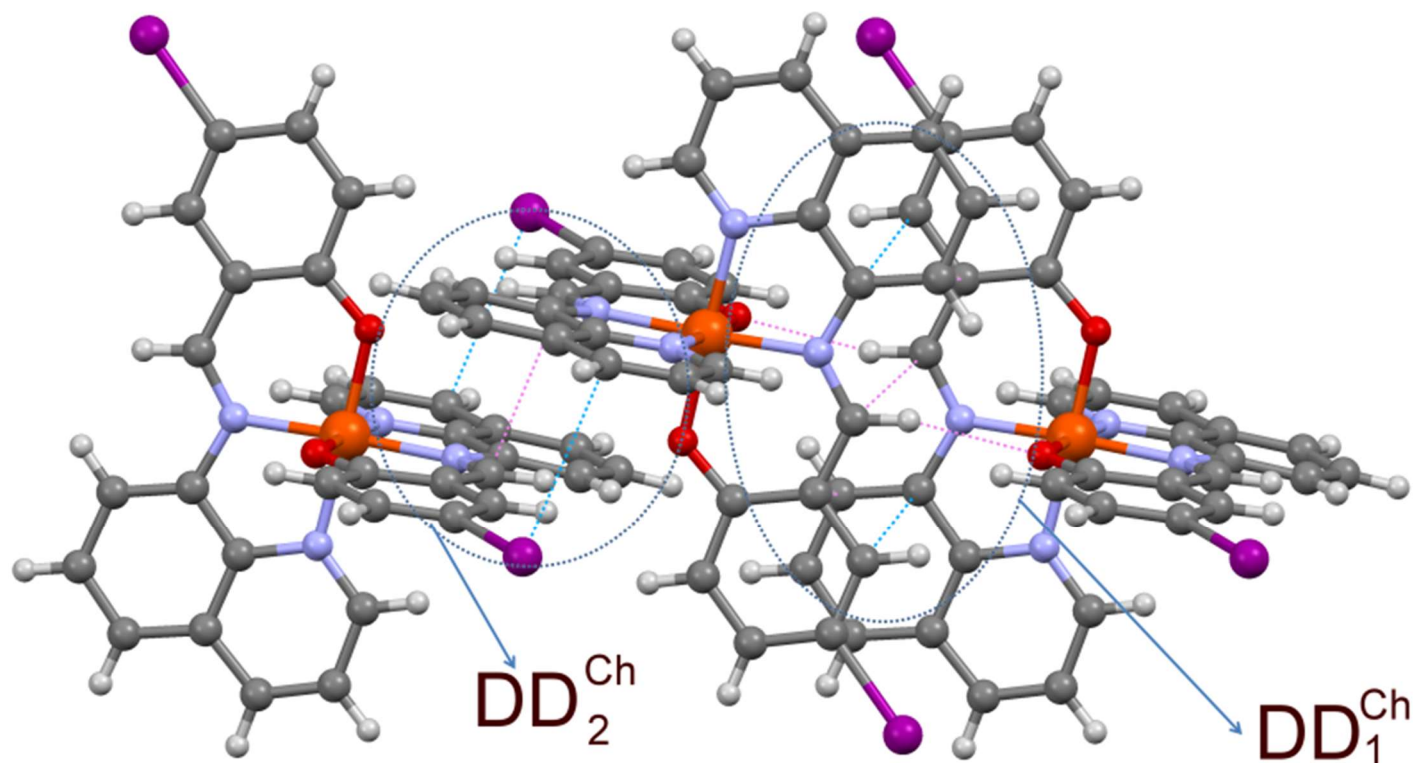

**Figure S12:** Detail of the intrachain arrangement and the most relevant DD contacts in **5.PF<sub>6</sub>.1.5H<sub>2</sub>O**. The short contacts colour code corresponds to the difference,  $\Delta$  in Å, between the distance of the contact and the sum of the van der Waals radii of the involved atoms: violet  $\Delta < -0.1$ ; light blue  $\Delta < 0.0$ .

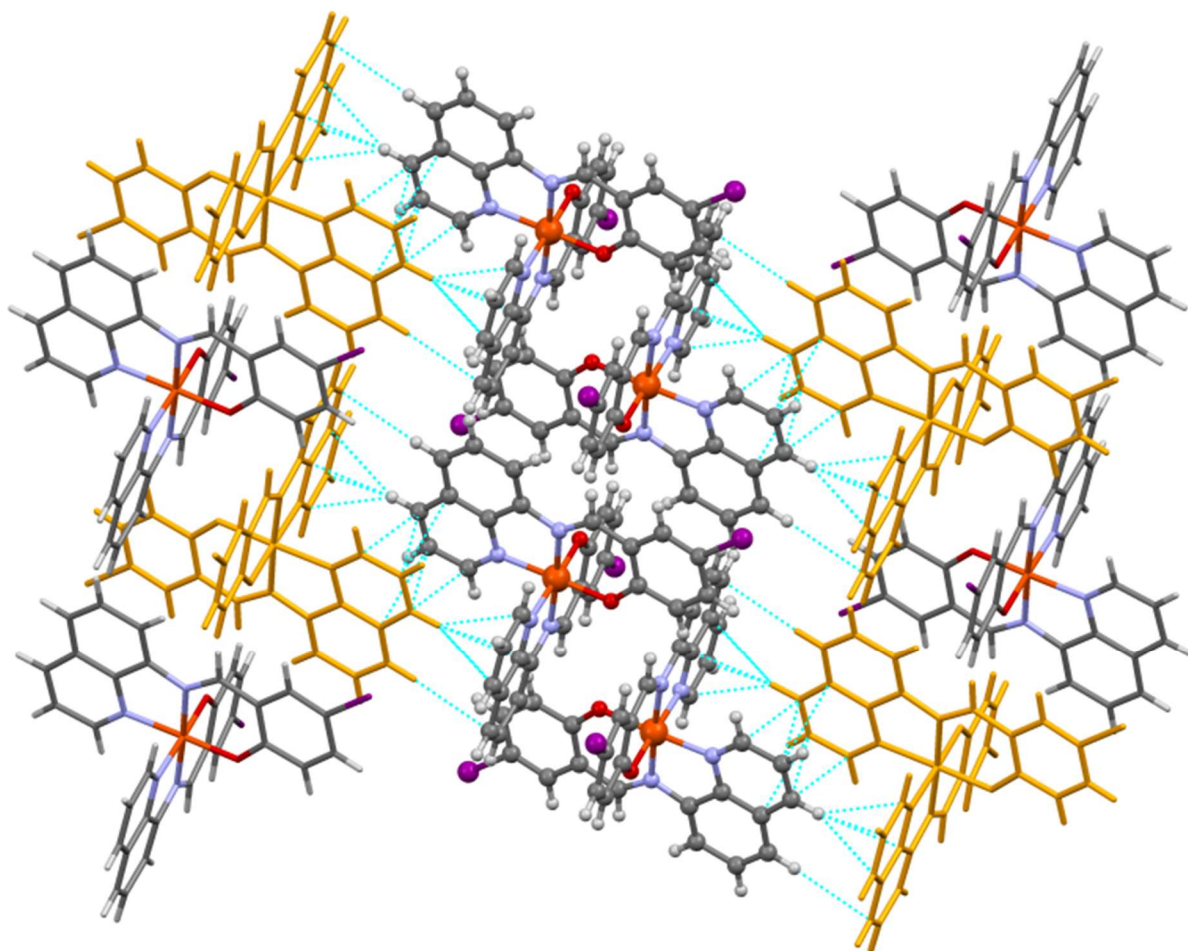

**Figure S13:** Arrangement of three cationic chains within one layer in **5PF<sub>6</sub>·1.5H<sub>2</sub>O**. The cations in central chain are in the “ball and stick mode”, while the cations of the other two are represented in the “stick mode”. The cations in orange displays strong  $\pi\pi$  interactions with cations from the central chain further reinforced by two fold CH... $\pi$  interactions. Only contacts shorter than the sum of the van der Waals radii are observed, shown in light blue according to the colour code of the other figures.

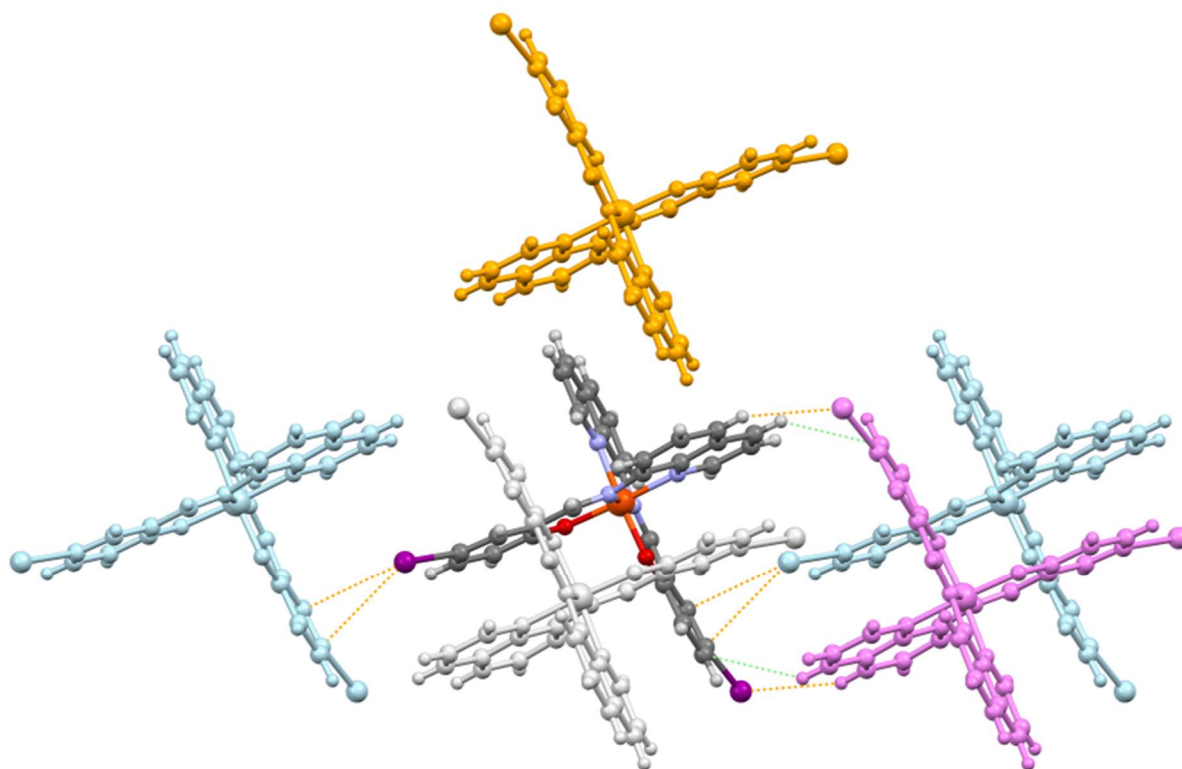

**Figure S14:** View in the default colour scheme of the interlayer DD contacts and arrangements of the  $[\text{Fe}(\text{5-I-qsal})_2]^+$  cations relative to a central cation for **5.PF<sub>6</sub>.1.5H<sub>2</sub>O**. Only the cations depicted in light blue and in violet belong to the neighbouring layers, those in light grey and orange are located in the same layer as the central cations (the contacts involving these cations are omitted for clarity). The short contacts colour code corresponds to the difference,  $\Delta$  in Å, between the distance of the contact and the sum of the van der Waals radii of the involved atoms: orange  $\Delta < 0.1$ ; light green  $\Delta < 0.2$ .

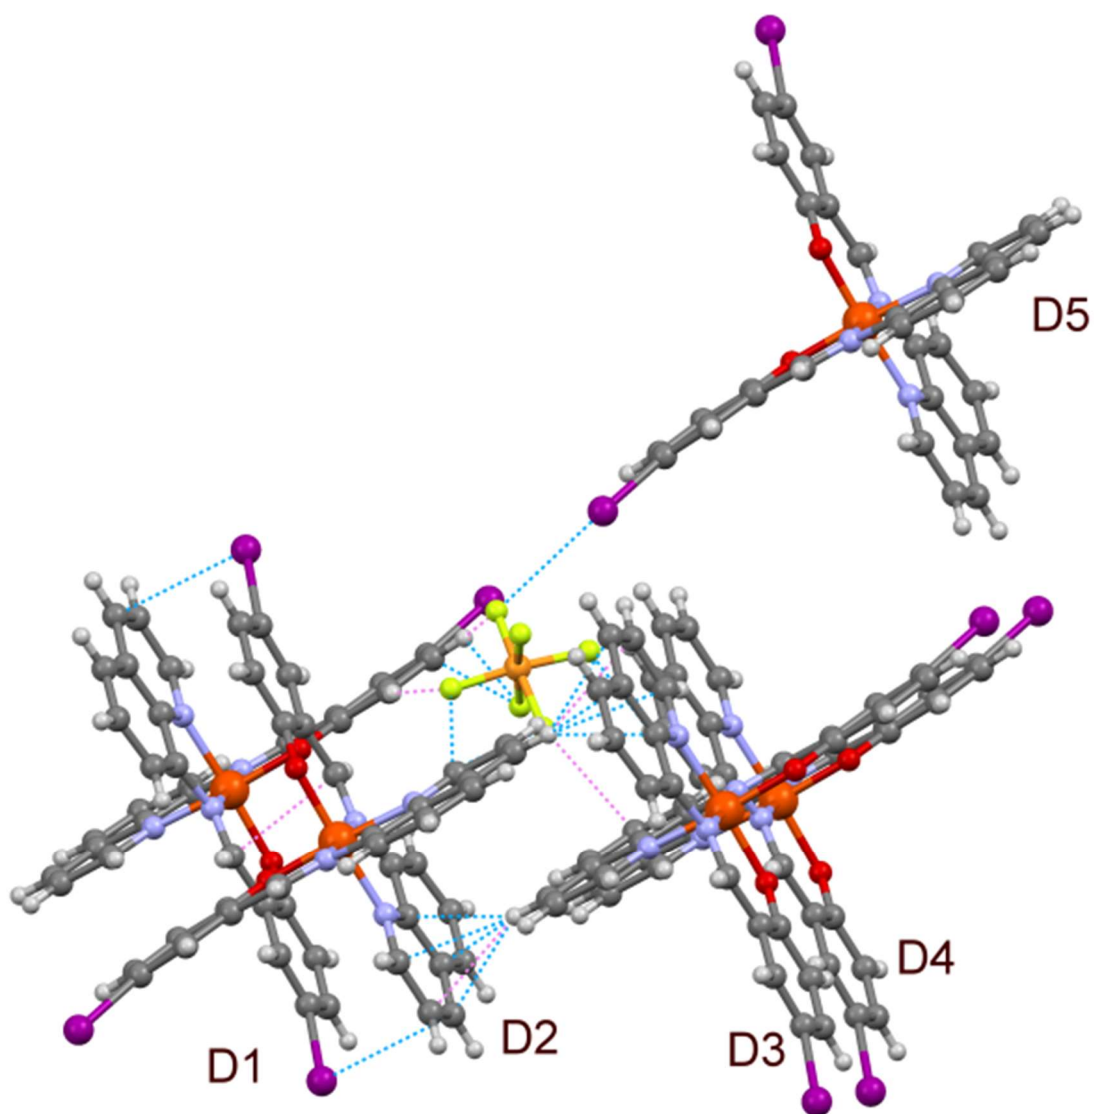

**Figure S15:** Indirect (D...A...D) connectivity mediated by one  $\text{PF}_6^-$  anion in  $5.\text{PF}_6.1.5\text{H}_2\text{O}$ . The anion shows interactions to four cations (D1-D4) in one layer and to another cation (D5) located in a neighbouring layer. The short contacts colour code corresponds to the difference,  $\Delta$  in Å, between the distance of the contact and the sum of the van der Waals radii of the involved atoms: violet  $\Delta < -0.1$ ; light blue  $\Delta < 0.0$ .

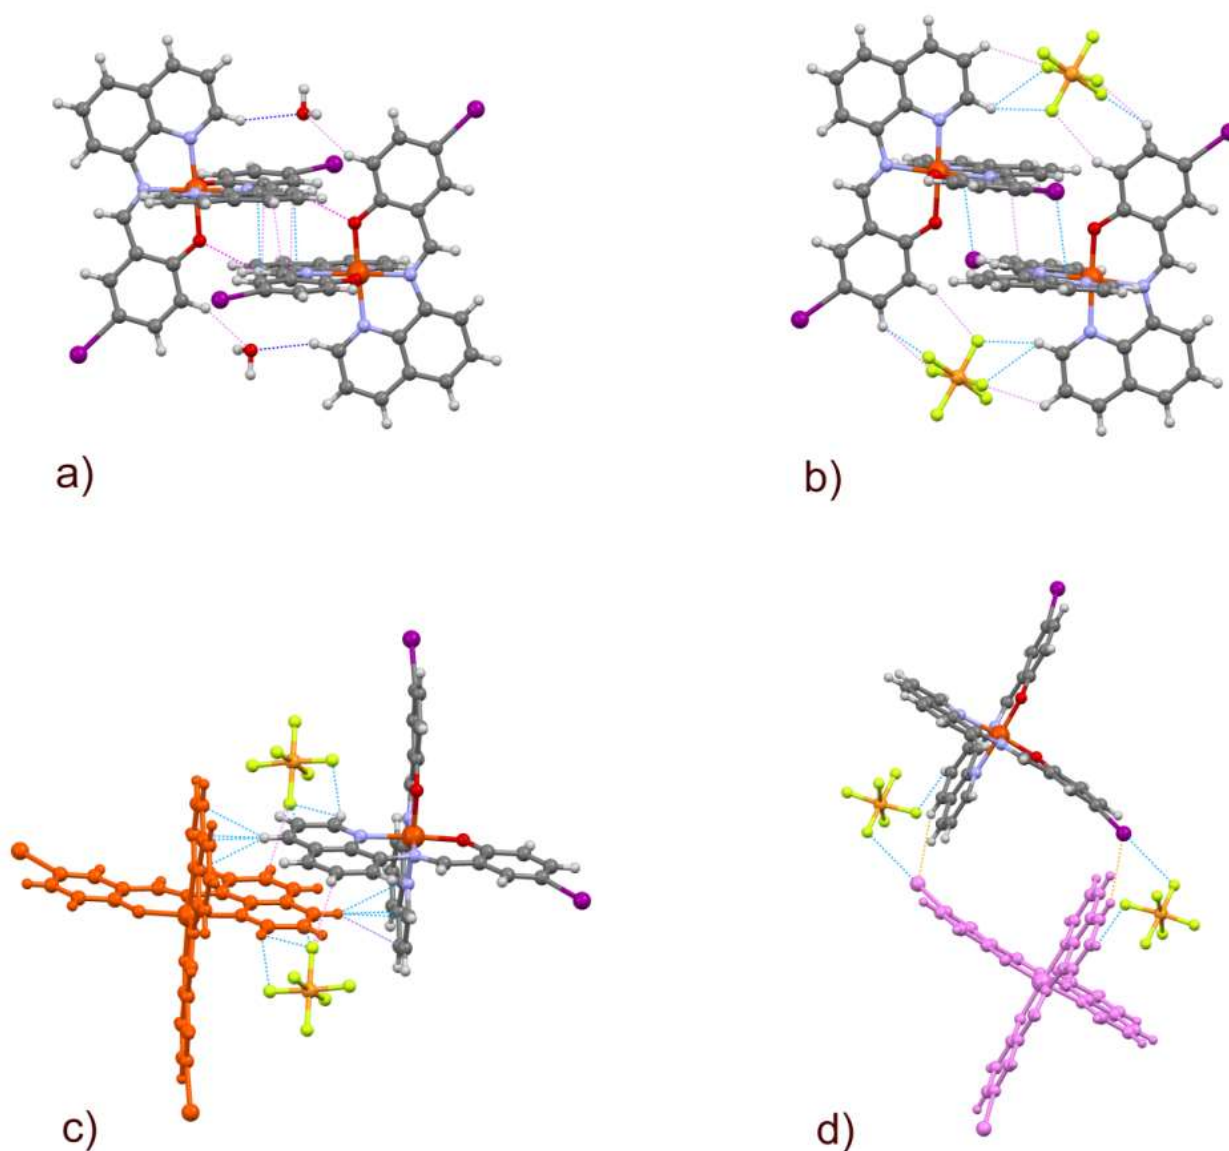

**Figure S16:** Indirect connectivity assistance to the direct DD intrachain, (a)  $DD^{Ch_1}$  and (b)  $DD^{Ch_2}$ , intralayer (c)  $DD^L$  and interlayer (d)  $DD^{iL_1}$  interactions in **5.PF<sub>6</sub>.1.5H<sub>2</sub>O**.  $DD^{Ch_1}$  is assisted by a pair of interactions mediated by the H<sub>2</sub>O molecules and for  $DD^{Ch_2}$ ,  $DD^L$  and  $DD^{iL_1}$  the DD interactions are assisted by a pair of DAD connections. The short contacts colour code corresponds to the difference,  $\Delta$  in Å, between the distance of the contact and the sum of the van der Waals radii of the involved atoms: dark blue  $\Delta < -0.3$ ; magenta  $\Delta < -0.2$ ; violet  $\Delta < -0.1$ ; light blue  $\Delta < 0.0$ ; orange  $\Delta < 0.1$ .



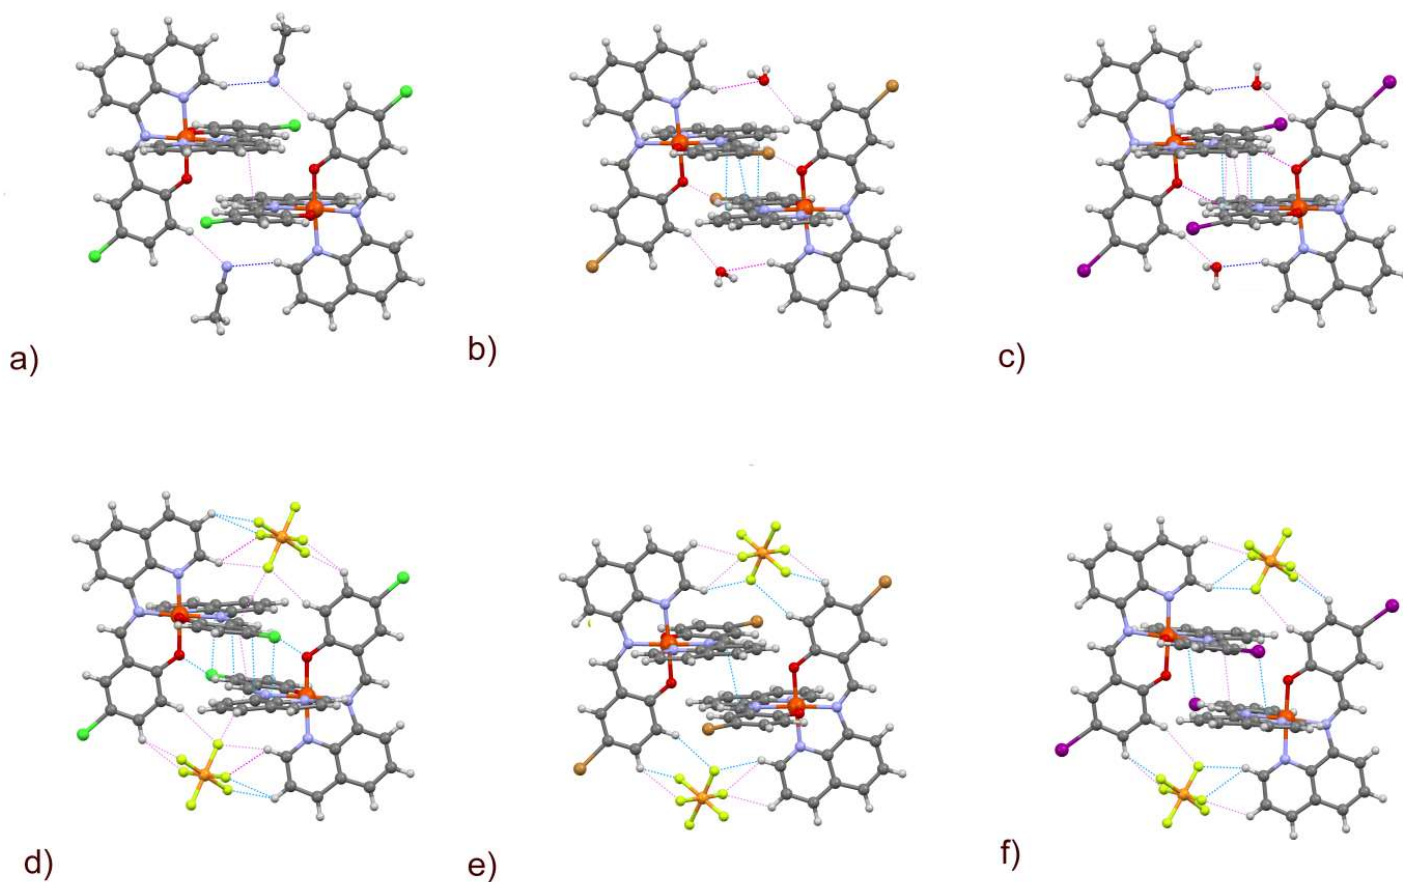

**Figure S17:** Intrachain indirect connectivity mediated by the solvent molecules and anions to the direct DD interactions ( $DD^{Ch_1}$  and  $DD^{Ch_2}$ ) in **3.PF<sub>6</sub>.MeCN** (a and d), **4.PF<sub>6</sub>.H<sub>2</sub>O** (b and e) and **5.PF<sub>6</sub>.1.5H<sub>2</sub>O** (c and f). The short contacts colour code corresponds to the difference,  $\Delta$  in Å, between the distance of the contact and the sum of the van der Waals radii of the involved atoms: dark blue  $\Delta < -0.3$ ; magenta  $\Delta < -0.2$ ; violet  $\Delta < -0.1$ ; light blue  $\Delta < 0.0$ .

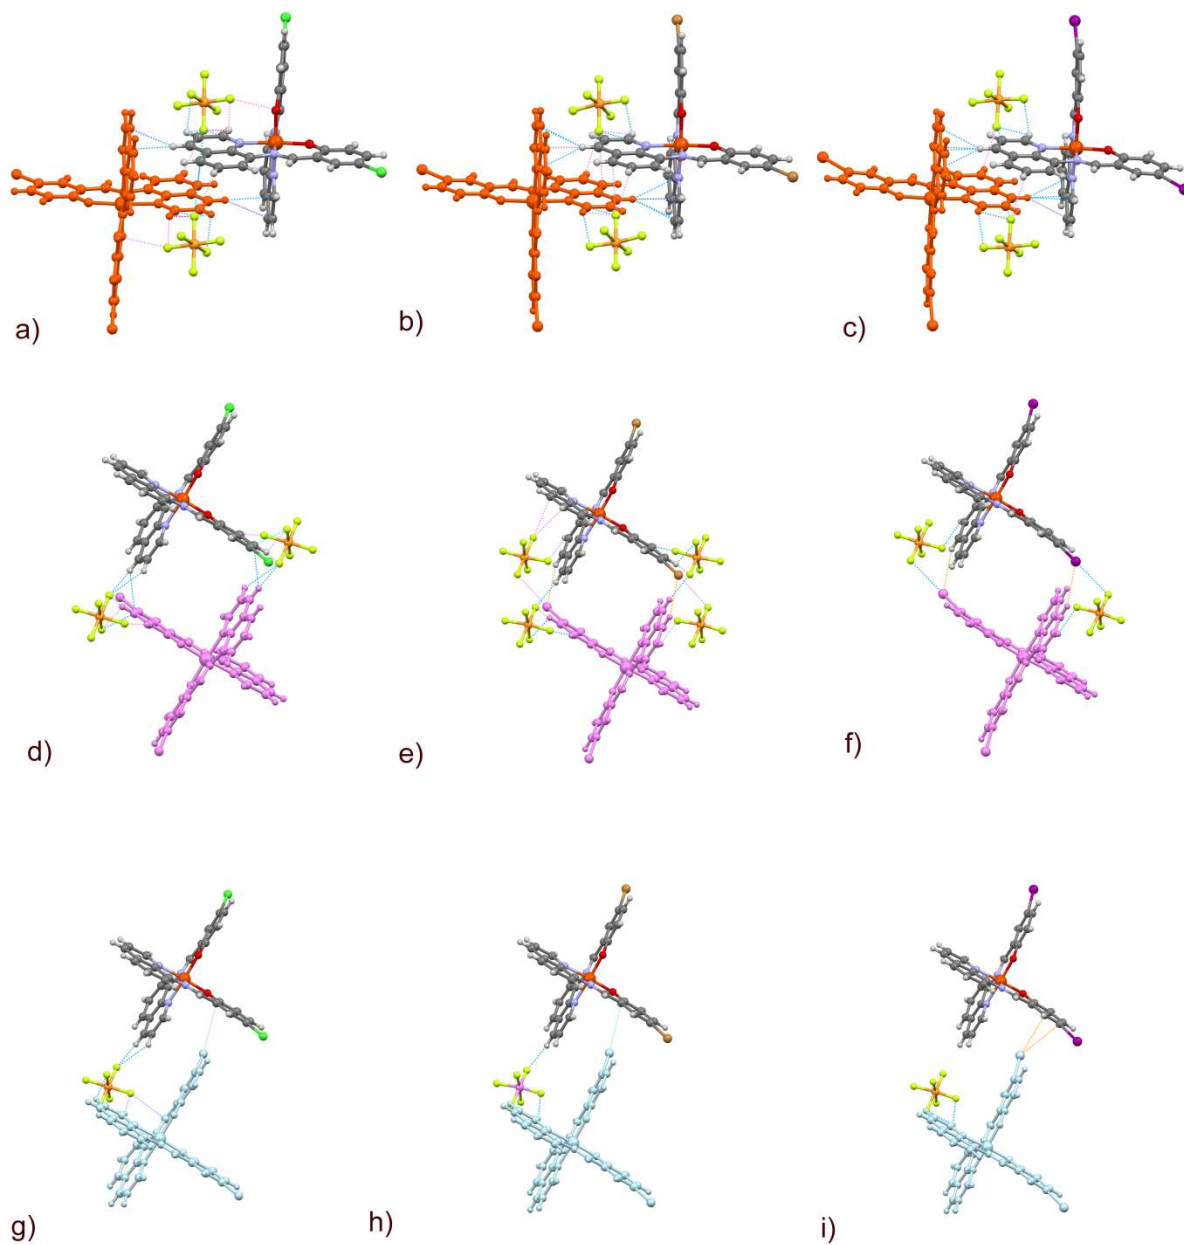

**Figure S18:** Indirect DAD connectivity assistance to the direct DD intralayer ( $DD^L$ ) and interlayer ( $DD^{iL_1}$  and  $DD^{iL_2}$ ) interactions regarding **3.PF<sub>6</sub>.MeCN** (a, d and g), **4.PF<sub>6</sub>.H<sub>2</sub>O** (b e and h) and **5.PF<sub>6</sub>.1.5H<sub>2</sub>O** (c, f and i). The short contacts colour code corresponds to the difference,  $\Delta$  in Å, between the distance of the contact and the sum of the van der Waals radii of the involved atoms: violet  $\Delta < -0.1$ ; light blue  $\Delta < 0.0$ ; orange  $\Delta < 0.1$ .
